# CLEAR: Composition of Likelihoods for Evolve And Resequence Experiments

Arya Iranmehr<sup>1</sup>, Ali Akbari<sup>1</sup>, Christian Schlötterer<sup>2</sup>, and Vineet Bafna<sup>3</sup>

<sup>1</sup>Electrical and Computer Engineering, University of California, San Diego, La Jolla, CA, USA.

<sup>2</sup>Institut für Populationsgenetik, Vetmeduni, Vienna, Austria.

<sup>3</sup>Computer Science and Engineering, University of California, San Diego, La Jolla, CA, USA.

## Abstract

Experimental evolution (EE) studies are powerful tools for observing molecular evolution “in-action” from populations sampled in controlled and natural environments. The advent of next generation sequencing technologies has made whole-genome and whole-population sampling possible, even for eukaryotic organisms with large genomes, and allowed us to locate the genes and variants responsible for genetic adaptation. While many computational tests have been developed for detecting regions under selection, they are mainly designed for static (single time) data, and work best when the favored allele is close to fixation. Conversely, EE studies provide samples over multiple time points, often at early stages of selective sweep.

While more predictive than static data analysis, a majority of the EE studies are constrained by the limited time span since onset of selection, depending upon the generation time of the organism. This constraint curbs the power of adaptation studies, as the population can only be evolved-and-resequenced for a small number of generations relative to the fixation-time of the favored allele. Moreover, coverage in pooled sequencing experiments varies across replicates and time points for every variant.

In this article, we directly address these issues while developing tools for identifying selective sweep in pool-sequenced EE of sexual organisms and propose Composition of Likelihoods for Evolve-And-Resequencing experiments (CLEAR). Extensive simulations show that CLEAR achieves higher power in detecting and localizing selection over a wide range of parameters. In contrast to existing methods, the CLEAR statistic is robust to variation of coverage. CLEAR also provides robust estimates of model parameters, including selection strength and overdominance, as byproduct of the statistical testing, while being orders of magnitude faster. Finally, we applied the CLEAR statistic to data from a study of *D. melanogaster* adaptation to alternating temperatures. We identified selection in many genes, including Heat Shock Proteins. The genes were enriched in “response to heat”, “cold acclimation” and “defense response to bacterium”, and other relevant biological processes.

## 1 Introduction

Natural selection is a key force in evolution, and a mechanism by which populations can adapt to external ‘selection’ constraints. Examples of adaptation abound in the natural world [24], including for example, classic examples like lactose tolerance in Northern Europeans [10], human adaptation to high altitudes [69, 84], but also drug resistance in pests [16], HIV [27], cancer [32, 85], malarial parasite [4, 52], and other antibiotic resistance [70]. In these examples, understanding the genetic basis of adaptation can provide actionable information, underscoring the importance of the problem.

Experimental evolution refers to the study of the evolutionary processes of a model organism in a controlled [8, 11, 33, 43, 44, 55, 56] or natural [6, 9, 17, 18, 48, 61, 83] environment. Recent advances

in whole genome sequencing have enabled us to sequence populations at a reasonable cost even for large genomes. Perhaps more important for experimental evolution studies, we can now evolve and re-sequence multiple replicates of a population to obtain *longitudinal time-series data*, in order to investigate the dynamics of evolution at molecular level. Although constraints such as small sizes, limited timescales, and oversimplified laboratory environments may limit the interpretation of EE results, these studies are increasingly being used to test a wide range of hypotheses [40] and have been shown to be more predictive than static data analysis [13, 19, 67]. In particular, longitudinal EE data is being used to estimate model parameters including population size [39, 58, 74, 79–81], strength of selection [12, 35, 36, 47, 50, 71, 74], allele age [47] recombination rate [74], mutation rate [7, 74], quantitative trait loci [5] and for tests of neutrality hypotheses [9, 14, 26, 74].

While objectives, designs and organisms of EE studies can be entirely different [7, 68], here we restrict our attention to the adaptive evolution of multi-cellular sexual organisms. For simplicity, we assume fixed population size, and for the most part, positive single locus selection (only one favored mutation). This regime has been considered earlier, typically with *D. melanogaster* as the model organism of choice, to identify adaptive genes in longevity and aging [14, 62] (600 generations), courtship song [77] (100 generations), hypoxia tolerance [86] (200 generations), adaptation to new laboratory environments [55, 75] (59 generations), egg size [38] (40 generations), C virus resistance [49] (20 generations), and dark-fly [37] (49 generations).

The task of identifying genetic adaptation can be addressed at different levels of specificity. At the coarsest level, identification could simply refer to deciding whether some genomic region (or a gene) is under selection or not. In the following, we refer to this task as *detection*. In contrast, the task of *site-identification* corresponds to the process of finding the favored mutation/allele at nucleotide level. Finally, *estimation of model parameters*, such as strength of selection and overdominance at the site, can provide a comprehensive description of the selection process.

A wide range of computational methods [78] have been developed to detect regions under positive selection. A majority of the existing methods focus on static data analysis; analysis of a single sample of the population at a specific time, either during the sweep, or subsequent to fixation of the favored allele. Static analysis is focused on reduction in genetic diversity [25, 30, 64, 73] shift in allele-frequencies, prevalence of long haplotypes [65, 78], population differentiation [14, 34] in multiple-population data and others. Many existing methods use the Site Frequency Spectrum (SFS, see Suppl. Fig. S1) to identify departure from neutrality. Classical examples including Tajima’s  $D$  [73], Fay and Wu’s  $H$  [25], Composite Likelihood Ratio [54], were all shown to be weighted linear combination of the SFS values [1]. While successful, these methods are prone to both, false negatives [51], as also false-discoveries due to confounding factors such as demography, including bottleneck and population expansions, and ascertainment bias [3, 51, 53, 59, 60]. Nevertheless, SFS based tests continue to be used successfully, often in combination with other tests [3, 78]. One of the contributions of this paper is the extension of SFS based methods to analyze time-series data, and the identification of selection regimes where these methods perform well.

Relative to the analysis of static samples, fewer tests-of-selection for dynamic time-series data have been proposed. Often, existing tests for static data are adopted for dynamic data with two time-points. Zhu *et al.* [86] used the ratio of the estimated population size of case and control populations to compute test statistic for each genomic region. Burke *et al.* [14] applied Fisher exact test to the last observation of data on case and control populations. Orozco-terWengel *et al.* [55] used the Cochran-Mantel-Haenszel (CMH) test [2] to detect SNPs whose read counts change consistently across all replicates of two time-point data. Turner *et al.* [77] proposed the diffStat statistic to test whether the change in allele frequencies of two population deviates from the distribution of change in allele frequencies of two drifting populations. Bergland *et al.* [9] applied

$F_{st}$  to populations throughout time to signify their differentiation from ancestral (two time-point data) as well as geographically different populations. Jha *et al.* [38] computed test statistic of generalized linear-mixed model directly from read counts. Bollback *et al.* [12] provided diffusion approximation to the continuous Wright Fisher Markov process and estimated  $s$  numerically and performed standard likelihood ratio test under  $\chi^2$  distribution.

It is only recently that direct tests for analyzing time-series data have been developed, and much of it is based on whole-genome sequencing of pools of individuals (pool-seq) at specific times. Using continuous-time continuous-state Brownian motion process, Feder *et al.* [26] proposed the Frequency Increment Test (FIT). More recently, Topa *et al.* [76] proposed a Gaussian Process (GP) for modeling single-locus time-series pool-seq data. Terhorst *et al.* [74] extended GP to compute joint likelihood of multiple loci under null and alternative hypotheses.

A key contribution of our paper is the development of a direct, and significantly faster method, CLEAR, for identifying selection in short-term experimental evolution with pool-seq data. We show for a wide range of parameters that CLEAR provides higher power for detecting selection, is robust to ascertainment bias due to coverage heterogeneity, estimates model parameters consistently, and localizes favored allele more accurately compared to the state-of-the-art methods, while being orders of magnitude faster.

## 2 Materials and Methods

**Notation.** Consider a locus with starting derived allele frequency  $\nu_0$ . Frequencies are sampled at  $T + 1$  distinct generations specified by  $\mathcal{T} = \{\tau_i : 0 \leq \tau_0 < \tau_1, \dots < \tau_T\}$ , and denoted by  $\boldsymbol{\nu} = \{\nu_0, \dots, \nu_T\}$ . Moreover,  $R$  replicate measurements are made, and we denote the  $r$ -th replicate frequency data as  $\boldsymbol{\nu}^{(r)}$ .

### 2.1 The CLEAR statistic

To test if a genomic region is evolving under natural selection, we consider a likelihood-based approach [54, 74, 76, 78] that (a) maximizes the likelihood of the time series data w.r.t. selection and overdominance parameters  $s, h$ , for each polymorphism in the region; and, (b) computes the log-odds ratio of the likelihood of selection model to the likelihood of neutral evolution/drift model, for every polymorphism in the region. Subsequently, (c) site likelihood ratios in a genomic region are combined to compute the CLEAR statistic, which is a composite likelihood score for the region being under selection. In addition to detecting selection, the CLEAR statistic can be used to rank variants for site-identification, and it provides maximum likelihood estimates of selection parameters.

**Likelihood for Neutral Model.** To model neutral evolution, it is natural to model the change in frequency  $\nu_t$  over time via Brownian motion [26] or Gaussian process [74, 76]. Significant deviations from this Null could be indicative of non-neutrality. However, in our experiments, we found that the Brownian motion approximation is inadequate for small populations, low starting frequencies and sparse sampling (in time) that are typical in experimental evolution (see Results, and Fig. 2). In fact, other “continuous” models such as Gaussian process for dynamic allele frequencies, are also susceptible to this issue (see Results and Fig. 5A-C).

Instead, by computing likelihood of data using a discrete-time discrete-state-space Wright-Fisher Markov chain, we turn the problem of small-population size into an advantage. Consider a neutrally evolving diploid population with  $N$  individuals. Define a  $2N \times 2N$  transition matrix  $P$ , where  $P^{(\tau)}[i, j]$  denotes probability of change in allele frequency from  $\frac{i}{2N}$  to  $\frac{j}{2N}$  in  $\tau$  generations,

solely due to genetic drift.  $P$  is defined as follows [22]:

$$P^{(1)}[i, j] = \Pr\left(\nu_{t+1} = \frac{j}{2N} \mid \nu_t = \frac{i}{2N}\right) = \binom{2N}{j} \nu_t^j (1 - \nu_t)^{2N-j}, \quad (1)$$

$$P^{(\tau)} = P^{(\tau-1)} P^{(1)} \quad (2)$$

Note that  $P^{(\tau)}$  needs to be computed only once and can be reused for all the variants in the genome. Also, precomputing and storing  $P^{(\tau)}$  is tractable and numerically stable for controlled experimental evolution experiments with  $N \leq 5000$ .

**Likelihood for Selection Model.** Assume that the site is evolving under selection constraints  $s \in \mathbb{R}$ ,  $h \in \mathbb{R}_+$ , where  $s$  and  $h$  denote selection strength and overdominance parameters, respectively. By definition, the relative fitness values of genotypes 0|0, 0|1 and 1|1 are given by  $w_{00} = 1$ ,  $w_{01} = 1 + hs$  and  $w_{11} = 1 + s$ . Recall that  $\nu_t$  denotes the frequency of the site at time  $\tau_t \in \mathcal{T}$ . Then,  $\nu_{t+}$ , the frequency at time  $\tau_t + 1$  (one generation ahead), can be estimated using:

$$\begin{aligned} \hat{\nu}_{t+} &= \mathbb{E}[\nu_{t+} | s, h, \nu_t] = \frac{w_{11}\nu_t^2 + w_{01}\nu_t(1 - \nu_t)}{w_{11}\nu_t^2 + 2w_{01}\nu_t(1 - \nu_t) + w_{00}(1 - \nu_t)^2} \\ &= \nu_t + \frac{s(h + (1 - 2h)\nu_t)\nu_t(1 - \nu_t)}{1 + s\nu_t(2h + (1 - 2h)\nu_t)}. \end{aligned} \quad (3)$$

For finite populations, let  $Q_{s,h}^{(\tau)}[i, j]$  denote the probability of transition from  $\frac{i}{2N}$  to  $\frac{j}{2N}$  in  $\tau$  generations. We model  $Q$  as follows (See [22], Pg. 24, Eqn. 1.58-1.59):

$$Q_{s,h}^{(1)}[i, j] = \Pr\left(\nu_{t+} = \frac{j}{2N} \mid \nu_t = \frac{i}{2N}; s, h\right) = \binom{2N}{j} \hat{\nu}_{t+}^j (1 - \hat{\nu}_{t+})^{2N-j} \quad (4)$$

$$Q_{s,h}^{(\tau)} = Q_{s,h}^{(\tau-1)} Q_{s,h}^{(1)} \quad (5)$$

For  $s = 0$ , Eq. 4 and 5 are identical to Eq. 1 and 2, respectively. The likelihood of observing the trajectory  $\boldsymbol{\nu}$  is computed using:

$$\mathcal{L}_M(s, h | \boldsymbol{\nu}) = \Pr(\boldsymbol{\nu}; s, h) = \prod_{t=1}^T \Pr(\nu_t | \nu_{t-1}; s, h) = \prod_{t=1}^T Q_{s,h}^{(\delta_t)}[\hat{i}_t, \hat{j}_t], \quad (6)$$

where,  $(\hat{i}_t, \hat{j}_t) = (2N\nu_{t-1}, 2N\nu_t)$ , and  $\delta_t = \tau_t - \tau_{t-1}$ . Combining the likelihood over independent replicate samples  $\boldsymbol{\nu}^{(r)}$ , we get:

$$\mathcal{L}_M(s, h | \{\boldsymbol{\nu}^{(r)}\}) = \prod_r \mathcal{L}_M(s, h | \boldsymbol{\nu}^{(r)}). \quad (7)$$

Let  $\hat{s}, \hat{h}$  denote the parameters that maximize the likelihood. The simplest form of (modified) likelihood ratio test statistic for each variant is given by

$$M = \text{sgn}(\hat{s}) \cdot \log \left( \frac{\mathcal{L}_M(\hat{s}, \hat{h} | \{\boldsymbol{\nu}^{(r)}\})}{\mathcal{L}_M(0, 0 | \{\boldsymbol{\nu}^{(r)}\})} \right). \quad (8)$$

**Accounting for Heterogeneous Ascertainment Bias.** In the discussion so far, we assumed that the exact allele frequencies are supplied. However, in most cases, allele frequencies are estimated from genotype data with small sample size or pool-seq data [46] (Suppl. Fig. S3,S2). In pool-seq datasets, the sequencing depth at a site varies for different replicates, and different time samples (Suppl. Fig. S4). Therefore, filtering low coverage variants can potentially discard useful information. For instance, in analyzing data from a study of *D. melanogaster* adaptation to alternating temperatures [55], by setting minimum read depth at a site to be 50, allowing the site to be retained only if the depth for all time points, and all replicates exceeded 50, the number of sites to be analyzed would drop from 1,733,121 to 11,232 (Suppl. Fig. S5). To account for this heterogeneity, we extend the Markov chain likelihood in Eq. 7 to a Hidden Markov Model (HMM) for pool-seq data.

Consider a variant position being sampled at time point  $\tau_t \in \mathcal{T}$ . We denote the pool-seq data for that variant as  $x_t = \langle c_t, d_t \rangle$  where  $d_t, c_t$  represent the read depth, and the read count of the derived allele, respectively, at time  $\tau_t$ . The time-series data is represented by the sequence  $\mathbf{x} = \{x_0, x_1, x_2, \dots, x_T\}$ . We model the dynamic pool-seq data using a an HMM with  $2N + 1$  states which state  $i$  ( $0 \leq i \leq 2N$ ) corresponds to allele frequency  $i/2N$ . Also, we note that HMM is stationary model in that transition and emission distributions do not change over time and defining these distributions completely specifies the HMM model. Eqs. 1, 2 define transition probabilities. The probability that state  $i$  emits  $x = \langle d, c \rangle$  is given by

$$\mathbf{e}_i(x) = \binom{d}{c} \left( \frac{i}{2N} \right)^c \left( 1 - \frac{i}{2N} \right)^{d-c}.$$

For  $1 \leq t \leq T$ , let  $\alpha_{t,i}$  denote the probability of emitting  $x_1, x_2, \dots, x_t$  and reaching state  $i$  at  $\tau_t$ . Then,  $\alpha_{t,i}$  can be computed using the forward-procedure [20]:

$$\alpha_{t,i} = \left( \sum_{1 \leq j \leq 2N} \alpha_{t-1,j} Q_{s,h}^{(\delta_t)}[j, i] \right) \mathbf{e}_i(x_t) . \quad (9)$$

where  $\delta_t = \tau_t - \tau_{t-1}$ . The joint likelihood of the observed data from  $R$  independent observations is given by

$$\mathcal{L}_H(s, h | \{\mathbf{x}^{(r)}\}) = \prod_{r=1}^R \mathcal{L}_H(s, h | \mathbf{x}^{(r)}) = \prod_{r=1}^R \sum_i \alpha_{T,i}^{(r)} . \quad (10)$$

Similar to Eq. 8, let  $\hat{s}, \hat{h}$  denote the parameters that maximize likelihood. The corresponding likelihood ratio statistic for each variant of pool-seq data is given by

$$H = \text{sgn}(\hat{s}) \cdot \log \left( \frac{\mathcal{L}_H(\hat{s}, \hat{h} | \{\mathbf{x}^{(r)}\})}{\mathcal{L}_H(0, 0 | \{\mathbf{x}^{(r)}\})} \right) . \quad (11)$$

**Composite Likelihood Ratio.** In general, the favored allele can be in linkage disequilibrium with some of its surrounding variation. The linked-loci hitchhike and share similar dynamics with the favored allele. Some models such as multi-locus Gaussian process [74] incorporate these associations by modeling linkage and recombination explicitly. However, these approaches are computationally expensive. Moreover, linkage computations are infeasible without haplotype resolved data, which pool-seq does not provide. Instead, we work with a simpler Composite Likelihood Ratio (CLR) [54, 82] computation to combine the individual scores of all variants into a composite score.

Consider a genomic region  $L$  to be a collection of segregating sites with little or no recombination between sites and the favored allele. This scenario holds when the starting frequency of the favored

allele is not high and the region is small. Let  $M_\ell$  (respectively,  $H_\ell$ ) denote the likelihood ratio score based on Markov chain (respectively, HMM) for each site  $\ell$  in  $L$ . The classical CLR is computed by averaging scores of all the variants withing the testing region. However, the levels of LD between favored allele and its surrounding variation depend on initial frequency  $\nu_0$ , strength of selection  $s$  and time since the onset of selection (see Appendix 6.5 for more details). Hence, we parameterize CLR to discard those polymorphisms that are in low LD with the favored allele, from computation of CLR. In particular, we can choose to only include sites whose likelihood ratio score is above a certain threshold. For percentile cut-off  $\pi$ , let  $L_\pi \subseteq L$  denote the set of sites whose likelihood ratio scores had percentile  $\pi$  or better. For all  $\pi$ , the CLR statistic for Markov chain and HMM is computed using:

$$\mathcal{M}_\pi = \frac{1}{|L_\pi|} \sum_{\ell \in L_\pi} M_\ell, \quad \mathcal{H}_\pi = \frac{1}{|L_\pi|} \sum_{\ell \in L_\pi} H_\ell. \quad (12)$$

In combining the sites, recall that sites that are not on the same lineage as the favored site, will reduce in frequency and have negative likelihood ratio values, but are still informative about selection. Therefore, we also define:

$$\mathcal{M}_\pi^+ = \frac{1}{|L_\pi|} \sum_{\ell \in L_\pi} |M_\ell|, \quad \mathcal{H}_\pi^+ = \frac{1}{|L_\pi|} \sum_{\ell \in L_\pi} |H_\ell|. \quad (13)$$

We also note here that unlike  $\mathcal{H}$ ,  $\mathcal{H}_\pi^+$  can be computed without knowledge of the ancestral allele.

**Final Word on Notation.** In the following, we use  $M$ , Eq. 8 (respectively,  $H$ , Eq. 11) to denote the CLEAR scores for individual variants. Similarly, we use  $\mathcal{M}_\pi, \mathcal{M}_\pi^+$  (respectively,  $\mathcal{H}_\pi, \mathcal{H}_\pi^+$ ) to denote the composite CLEAR scores for a genomic region. In this notation,  $\mathcal{H}_{100} = \mathcal{H}_{100}^+$  corresponds to the CLR based on choosing the best site in a region, while  $\mathcal{H}_0, \mathcal{H}_0^+$  both correspond to the CLR based on all sites in the region. For ease of notation, we sometimes use  $\mathcal{H}$ , or  $\mathcal{H}^+$  to denote CLEAR scores in results, when the choice of  $\pi$  is apparent.

**Site-identification.** Once a genomic region is clasified to be under selection by  $\mathcal{H}$  or  $\mathcal{M}$  statistic, individual variant scores ( $M$  or  $H$ ) in a region are ranked to predict the favored site. In general, identifying the favored site in pool-seq data is difficult [75], due to extensive span of hitchhikers in an ongoing sweep (see Appendix 6.5 for more detail). In our analysis of the *D. melanogaster* EE data, we identify a set of “candidate” variants whose scores exceed a False Discovery Rate threshold based on the distribution of CLEAR scores on negative controls.

**Estimating Parameters.** Depending on data (read count or allele frequency) the optimal value of the parameters can be found by

$$\hat{s}, \hat{h} = \arg \max_{s, h} \sum_r^R \log \left( \mathcal{L}_{\mathcal{M}}(s, h | \nu^{(r)}) \right), \quad \text{or}, \quad (14)$$

$$\hat{s}, \hat{h} = \arg \max_{s, h} \sum_r^R \log \left( \mathcal{L}_{\mathcal{H}}(s, h | \mathbf{x}^{(r)}) \right). \quad (15)$$

where likelihoods are defined in Eq. 7 and Eq. 10, respectively. The parameters in Eqs. 14, 15 are optimized using grid search. By broadcasting and vectorizing the grid search operations across all variants, the genome scan on millions of polymorphisms can be done in significantly smaller time than iterating a numerical optimization routine for each variant(see Results and Fig. 6). The value of the overdominance parameter can provide extra information regarding dominance of the favored allele and the kind of selection [31] (See Suppl. Fig. S6,S7):



| Value     | Condition                 |
|-----------|---------------------------|
| $h = 0$   | recessive adaptive allele |
| $h = 0.5$ | directional selection     |
| $h = 1$   | dominant adaptive allele  |
| $h > 1$   | overdominance             |

Table 1: **Overdominance parameter values and their implications.**

**Precomputing Transition Matrices.** CLEAR requires a one-time computation of matrices  $Q_{s,h}^{(\tau)}$  for the entire range of  $s, h$  values. Precomputation of 909 transition matrices for  $s \in \{-0.5, -0.49, \dots, 0.5\}$  and  $h \in \{0, 0.25, \dots, 2\}$  took less than 15 minutes ( $\approx 1$  second per matrix) on a desktop computer with a Core i7 CPU and 16GB of RAM.

## 2.2 Extending Site Frequency Spectrum based tests for time series data

The site frequency spectrum (SFS) is a mainstay of tests of neutrality and selection, and can be computed using pool-seq data (does not need haplotypes). Following Fu, 1995 [29], any linear combination of the site frequencies is an estimate of  $\theta$ . However, under non-neutral conditions, different linear combinations behave differently. Therefore, many popular tests of neutrality either compute differences of two estimates of  $\theta$ , or perform cross-population tests comparing the  $\theta$  estimates in two different populations [1, 64, 66].

We asked if SFS-based tests could be adapted for time-series data. A simple approach is to use cross-population SFS tests on the populations at time 0 (before onset of selection), and at time sample  $\tau_t$ , for each  $t$ . Evans *et al.* [21] developed diffusion equations for evolution of SFS in time series, but they are difficult to solve. Instead, we derive a formula for computing  $D_t$ , the dynamic of Tajima’s  $D$  at generation  $t$ . Specifically, for initial value  $D_0$ , initial carrier frequency  $\nu_0$  and selection coefficient  $s$ :

$$D_t = D_0 - \log(1 - \nu_t) \frac{W_0}{\log(2N)} - \nu_t^2 \Pi_0, \quad (16)$$

where  $W_0$  and  $\Pi_0$  are Watterson’s and Tajima’s estimates of  $\theta$  in the initial generation (Appendix 6.2). See Suppl. Fig. S8 for comparison to empirical values from simulations. Similarly, we show (Appendix 6.3), that the dynamics of Fay and Wu’s  $H$  statistic [25] are directly related to expected value of the of Haplotype Allele Frequency (HAF) score [63], and can be written as a function of  $\nu_t$  as follows:

$$NH_t = \theta \nu_t \left( \frac{\nu_t + 1}{2} - \frac{1}{(1 - \nu_t)N + 1} \right) + \theta(1 - \nu_t) \left( \frac{N + 1}{2N} - \frac{1}{(1 - \nu_t)N + 1} \right) \quad (17)$$

In both cases,  $\nu_t$  itself can be written as a function of  $s, t$  (Suppl. Eq. S3). This allows us to compute likelihood functions  $\mathcal{L}_S(s; \{D_t\})$  or  $\mathcal{L}_S(s; \{H_t\})$ . Then, a likelihood ratio, similar to Eqns. 8, 11 provides a statistic for detecting selection in each window.

However, as  $\nu_0$  and  $D_0$  are often unknown in sampling from natural populations, we do not directly use Eqns. 16, 17. Instead, we heuristically aggregate statistics throughout time to compute a time-series score (Appendix 6.4).

## 2.3 Simulations

We performed extensive simulations using parameters that have been used for *D. melanogaster* experimental evolution [42]. See also Fig. 1 for illustration. To implement real world pool-seq experimental evolution, we conducted simulations as follows:

- I. **Creating initial founder line haplotypes.** Using `msms` [23], we created neutral populations for  $F$  founding haplotypes with command `./msms <F> 1 -t <2μLNe> -r <2rNeL> <L>`, where  $F = 200$  is number of founder lines,  $N_e = 10^6$  is effective population size,  $r = 2 \times 10^{-8}$  is recombination rate,  $\mu = 2 \times 10^{-9}$  is mutation rate and  $L = 50K$  is the window size in base pairs which gives  $\theta = 2\mu N_e L = 200$  and  $\rho = 2N_e r L = 2000$ .
- II. **Creating initial diploid population.** To simulate experimental evolution of diploid organisms, initial haplotypes were first cloned to create  $F$  diploid homozygotes. Next, each diploid individual was cloned  $N/F$  times to yield diploid population of size  $N$ .
- III. **Forward Simulation.** We used forward simulations for evolving populations under selection. We also consider selection regimes which the favored allele is be chosen from standing variation (not *de novo* mutations). Given initial diploid population, position of the site under selection, selection strength  $s$ , number of replicates  $R = 3$ , recombination rate  $r = 2 \times 10^{-8}$  and sampling times  $\mathcal{T} = \{0, 10, 20, 30, 40, 50\}$ , `simuPop` [57] was used to perform forward simulation and compute allele frequencies for all of the  $R$  replicates. For hard sweep (respectively, soft sweep) simulations we randomly chosen a site with initial frequency of  $\nu_0 = 0.005$  (respectively,  $\nu_0 = 0.1$ ) to be the favored allele.
- IV. **Sequencing Simulation.** Give allele frequency trajectories we sampled depth of each site identically and independently from  $\text{Poisson}(\lambda)$ , where  $\lambda \in \{30, 100, 300, \infty\}$  is the coverage for the experiment. Once depth  $d$  is drawn for the site with frequency  $\nu$ , the number of reads  $c$  carrying the derived allele are sampled according to  $\text{Binomial}(d, \nu)$ . For experiments with finite depth the tuple  $\langle c, d \rangle$  is the input data for each site. Infinite depth experiments refer to the case, where the true allele frequency is provided and Markov and HMM likelihood computations give identical results.

We also conducted simulations to evaluate performance for cases involving evolution and resequencing of natural populations. Sampling from natural populations differs from (controlled) experimental evolution in some important ways. First, the time of onset of selection may not be known. Second, as the start of sampling can be any generation during selective sweep, mutations that arose after the onset of selection appear in data can have a nontrivial effect on SFS, specifically if sampling is started long after onset of selection. While SFS based techniques are expected to perform poorly in controlled EEs, their power is highest near fixation. To simulate these scenarios, `msms` was used to forward-simulate a population with  $N_e = 10^4$ ,  $\nu_0 = 10^{-4}$ , and to record SFS of a 50Kbp region (Fig. 1A). The remaining parameters were identical to controlled experimental evolution simulations.

**False Discovery Rate (FDR).** We applied CLEAR to the data from a study of *D. melanogaster* adaptation to alternating temperatures [55], by computing the  $\mathcal{H}^+$  statistic for sliding windows of 30Kbp with steps of 10Kbp over the entire genome. Due to the great variation in the density of polymorphic sites, we observed a large variation in scores. Moreover, high LD between proximal sites resulted in many neighboring windows with similar scores. Therefore, we computed a local false discovery rate for any candidate window by choosing an encompassing genomic region of 2Mbp to preserve the genomic background. For each candidate window, we sampled a subset of variants from the encompassing region 10,000 times, and computed the  $\mathcal{H}^+$  score. The candidate window was selected if its score was among the top 1% of scores in the permuted tests.



### 3 Results

**Modeling Allele Frequency Trajectories in Finite Populations.** We first tested the goodness of fit of the discrete-time Markov chain versus continuous-time Brownian motion (Gaussian approximation) in modeling allele frequency trajectories in finite populations, under different sampling schemes and starting frequencies. For this purpose, we conducted 100K simulations with two time samples  $\mathcal{T} = \{0, \tau\}$  where  $\tau \in \{1, 10, 100\}$  is the parameter controlling the density of sampling in time. In addition, we repeated simulations for different values of starting frequency  $\nu_0 \in \{0.005, 0.1\}$  (i.e., hard and soft sweep) and selection strength  $s \in \{0, 0.1\}$  (i.e., neutral and selection). Then, given initial frequency  $\nu_0$ , we computed expected distribution of the frequency of the next sample  $\nu_\tau$  under two models and compared them with empirical distributions calculated from simulated data. Fig. 2A-F shows that Brownian motion is inadequate when  $\nu_0$  is far from 0.5, or when sampling times are sparse ( $\tau > 1$ ). If the favored allele arises from standing variation in a neutral population, it is unlikely to have frequency close to 0.5, and the starting frequencies are usually much smaller (see Suppl. Fig. S1). Moreover, in typical *D. melanogaster* experiments for example, sampling is sparse. Often, the experiment is designed so that  $10 \leq \tau \leq 100$  [42, 55, 86].

In contrast to the Brownian motion results, Markov chain can provide predictions when the allele is under selection. In addition Fig. 2A-M also shows that Markov chain predictions (Eq. 5) are highly consistent with empirical data for a wide range of simulation parameters.

**Detection Power.** We compared the performance of CLEAR against other methods for detecting selection. For each method we calculated detection power as the percentage of true-positives identified with false-positive rate  $\leq 0.05$  (Suppl. Fig. S9). For each configuration (specified with values for selection coefficient  $s$ , starting allele frequency  $\nu_0$  and coverage  $\lambda$ ), power of each method is evaluated over 2000 distinct simulations, half of which modeled neutral evolution and the rest modeled positive selection.

Before comparing against other methods, we first evaluated the use of CLEAR with different percentile-cutoffs  $\pi$  (Eq. 12) in computing composite statistics of a region. For each configuration, we computed average Power for  $s \in \{0.025, 0.05, 0.075, 0.1\}$ , using  $\mathcal{H}_\pi, \mathcal{H}_\pi^+$ . We computed the optimal value of  $\pi$  using a line-search. Fig. 3 reveals several important trade-off between  $\pi$ , initial frequency, and coverage.

- $\mathcal{H}_\pi^+$  consistently achieves a high power for  $\pi = 0$ , and in the absence of knowledge of the selection regime or the ancestral allele,  $\mathcal{H}_0^+$  is a powerful statistic to use.
- In every scenario tested,  $\max_\pi \{\text{Power}(\mathcal{H}_\pi)\} \geq \max_\pi \{\text{Power}(\mathcal{H}_\pi^+)\}$ , suggesting that it is beneficial to make predictions based on  $\mathcal{H}_\pi$ , if the selection regime is well-understood and ancestral allele is known.
- In soft sweep, relative to hard sweep, it helps to choose a higher value of the cut-off  $\pi$ . This is consistent with the fact that LD between the favored site and other sites is generally lower for soft sweep. For instance, in soft sweep with infinite coverage (Fig. 3F), optimum is gained at  $\pi = 100$ , equivalent to considering the score of the highest scoring site as  $\mathcal{H}$  statistic of the region.
- When coverage is low (Fig. 3A,D), it helps to accumulate evidence from multiple sites, and the best results are achieved for lower values of  $\pi$ .

In the following tests, we fix the value of  $\pi = 70, 97, 99$  for  $\lambda = 30, 100, 300$ , respectively, and simplify notation by denoting the optimum score as  $\mathcal{H}$ . For example, when  $\lambda = 30$ ,  $\mathcal{H}$  corresponds to  $\mathcal{H}_{70}$ . In addition, we use  $\mathcal{H}^+$  to denote  $\mathcal{H}_0^+$ . We also compared  $\mathcal{M}$  (Markov likelihoods) versus  $\mathcal{H}$ . As shown in Fig. 4,  $\mathcal{H}$  has better power for low coverage ( $\lambda = 30$ ) compared to  $\mathcal{M}$  decays.

Finally, we compared the power of CLEAR with Gaussian process (GP) [74], FIT [26], and CMH [2] statistics. As CMH only takes read count data, here we used  $\lambda = 300$  to implement infinite coverage scenario. All methods other than CLEAR and CMH convert read counts to allele frequencies prior to computing the test statistic. CLEAR shows the highest power in all cases and the power stays relatively high even for low coverage (Fig. 5 and Table S1). In particular, the difference in performance of CLEAR with other methods is pronounced when starting frequency is low. Starting frequency is at its minimum in selection on an allele from *de novo* mutations and is likely to be low if selection is on an allele from standing variation (Suppl. Fig. S1). The advantage of CLEAR stems from the fact that favored allele with low starting frequency might be missed by low coverage sequencing. In this case, incorporating the signal from linked sites becomes increasingly important. We note that methods using only two time points, such as CMH, do relatively well for high selection values and high coverage. However, the use of time-series data can increase detection power in low coverage experiments or when starting frequency is low. Moreover, time-series data provide means for estimating selection parameters  $s, h$  (see below). Finally, as CLEAR is robust to change of coverage, our results (Fig. 5B,C) suggest that taking many samples with lower coverage is preferable to sparse sampling with higher coverage.

**SFS for Detection in Natural Samples.** We did not show the SFS based statistics in Fig. 5 as they did not perform better than random. In majority of controlled experimental evolution studies, the population is restricted set of  $F$  founder lines, where  $F \ll N_e$  (Fig. 1B) and inbred during the experiment. This creates a severe bottleneck, confounding SFS. Suppl. Fig. S11 demonstrates the effect of experimental evolution on different SFS statistics under neutral evolution for 1000 simulations. A second problem with using SFS for experimental evolution is that the sampling starts right after the onset of experimentally induced selection, and the favored allele may not reach high enough frequency to modify the site frequency spectrum (Suppl. Fig. S10).

However, in experiments involving naturally evolving populations, even if the span of the time-series is small, the onset of selection might occur many generations prior to sampling. To test performance of SFS-based statistics in natural evolution, using `msms`, we conducted 200 (100 neutral and 100 sweep) forward simulations for different values of  $s$ ,  $N_e = 10K$  and  $N = 200$ . The start of sampling was chosen randomly after onset of selection in two distinct scenarios. Let  $t_{\nu=x}(s, N_e)$  denote the expected time (in generations) required to reach carrier frequency  $x$  in a hard sweep and  $U[a, b]$  denote discrete uniform distribution in the interval  $[a, b]$ . First we considered the case when start of sampling is chosen throughout the whole sweep. i.e.,  $\tau_0 \sim U[1, t_{\nu=1}(s, N_e)]$  (Fig. 7A). Next, we considered sampling start time chosen nearer to fixation of the favored allele, i.e.,  $\tau_0 \sim U[t_{\nu=0.9}(s, N_e), t_{\nu=1}(s, N_e)]$  (Fig. 7B). In both scenarios, sampling was done over 6 time points within 50 generations of  $\tau_0$  (Fig. 1A). We compared CLEAR, GP, FIT with both static and dynamic SFS based statistics of SFSelect and Tajima's D. Fig. 7A shows that SFS based statistics are outperformed by other methods. However, when sampling is performed close to fixation, i.e., when the favored allele has frequency of 0.9 or higher, SFS based statistics perform considerably better than GP, FIT and CLEAR (Fig. 7b). Moreover, dynamic SFS statistics provide higher power than static SFS statistics, demonstrating that in the use of time-series SFS based statistics is advantageous.

**Site-identification.** In general, localizing the favored variant, using pool-seq data is a nontrivial task [75]. We used the simple approach of ranking each site in a region detected as being under selection. The sites were ranked according to the likelihood ratio scores (Eqns. 8, 11). For each setting of  $\nu_0$  and  $s$ , we conducted 1000 simulations and computed the rank of the favored mutation in each simulation. The cumulative distribution of the rank of the favored allele in 1000 simulation for each setting (Fig. 8) shows that CLEAR outperforms other statistics. We also compared each

method to see how often it ranked the favored site in as the top ranked site (Table 2A-B), among the top 10 ranked sites (Table 2C-D), and among the top 50 (Table 2E-F) ranked sites. In the  $\approx 1150$  variants tested, CLEAR performed consistently better than other methods in all of these measures.

An interesting observation is revisiting the contrast between site-identification and detection [45, 75] (Appendix 6.5). When selection coefficient is high, detection is easier (Fig. 5A-F), but site-identification is harder due to the high LD between hitchhiking sites and the favored allele (Table 2A-F). Moreover, site-identification is harder in hard sweep scenarios relative to soft sweeps. For example, when coverage  $\lambda = 100$  and selection coefficient  $s = 0.1$ , the detection power is 75% for hard sweep, but 100% for soft sweep (Fig. 5B-E). In contrast, the favored site was ranked as the top in 14% of hard sweep cases, compared to and 95% of soft sweep simulations (Table 2A-B).

| Hard Sweep |     |     |    |       | Soft Sweep |     |     |     |       |
|------------|-----|-----|----|-------|------------|-----|-----|-----|-------|
| (A)        |     |     |    |       | (B)        |     |     |     |       |
| $s$        | CMH | FIT | GP | CLEAR | $s$        | CMH | FIT | GP  | CLEAR |
| 0.025      | 3   | 0   | 0  | 2     | 0.025      | 9   | 1   | 4   | 11    |
| 0.05       | 5   | 0   | 0  | 5     | 0.05       | 53  | 10  | 51  | 63    |
| 0.075      | 11  | 0   | 0  | 10    | 0.075      | 87  | 31  | 92  | 91    |
| 0.1        | 15  | 0   | 0  | 14    | 0.1        | 93  | 54  | 95  | 95    |
| (C)        |     |     |    |       | (D)        |     |     |     |       |
| $s$        | CMH | FIT | GP | CLEAR | $s$        | CMH | FIT | GP  | CLEAR |
| 0.025      | 21  | 3   | 0  | 15    | 0.025      | 34  | 8   | 27  | 44    |
| 0.05       | 39  | 2   | 0  | 28    | 0.05       | 86  | 41  | 86  | 92    |
| 0.075      | 57  | 4   | 0  | 49    | 0.075      | 100 | 81  | 100 | 100   |
| 0.1        | 78  | 4   | 0  | 71    | 0.1        | 100 | 97  | 100 | 100   |
| (E)        |     |     |    |       | (F)        |     |     |     |       |
| $s$        | CMH | FIT | GP | CLEAR | $s$        | CMH | FIT | GP  | CLEAR |
| 0.025      | 51  | 19  | 0  | 43    | 0.025      | 60  | 22  | 62  | 75    |
| 0.05       | 70  | 18  | 0  | 66    | 0.05       | 96  | 69  | 97  | 99    |
| 0.075      | 85  | 20  | 2  | 81    | 0.075      | 100 | 97  | 100 | 100   |
| 0.1        | 94  | 26  | 6  | 93    | 0.1        | 100 | 100 | 100 | 100   |

Table 2: **Percentage of simulations which favored allele appears in top of the ranking.** Percentage of simulations in which the favored allele is ranked first (A-B); appears in top 10 (C-D); or, appears in top 50 (E-F). In soft sweep simulations (B,D,F), the ranks are consistently better than hard sweep simulations (A,C,E). This can be attributed to lower LD between the hitchhikers (false positives) and favored allele in soft sweep scenarios.

**Estimating Parameters.** CLEAR computes the selection parameters  $\hat{s}$  and  $\hat{h}$  as a byproduct of the hypothesis testing. We computed bias of selection fitness ( $s - \hat{s}$ ) and overdominance ( $h - \hat{h}$ ) for of CLEAR and GP in each setting. The distribution of the error (bias) for  $100\times$  coverage is presented in Fig. 9 for different configurations. Suppl. Fig. S12, S13 provide the distribution of estimation errors for  $30\times$ , and infinite coverage, respectively. For hard sweep, CLEAR provides estimates of  $s$  with lower variance of bias (Fig.9A). In soft sweep, GP and CLEAR both provide unbiased estimates with low variance (Fig. 9B). Fig. 9C-D shows that CLEAR provides unbiased estimates of  $h$  as well.

**Running Time.** As CLEAR does not compute exact likelihood of a region (i.e., does not explicitly model linkage between sites), the complexity of scanning a genome is linear in number of polymorphisms. Calculating score of each variant requires  $\mathcal{O}(TR)$  and  $\mathcal{O}(TRN^2)$  computation for  $\mathcal{M}$ , and  $\mathcal{H}$ , respectively. However, most of the operations can be vectorized for all replicates to make the effective running time for each variant. We conducted 1000 simulations and measured running times for computing site statistics  $M$ ,  $H$ , FIT, CMH and GP with different number of linked-loci. Our analysis reveals (Fig. 6) that CLEAR is orders of magnitude faster than GP, and comparable to FIT. While slower than CMH on the time per variant, the actual running times are comparable after vectorization and broadcasting over variants (see below).

These times can have a practical consequence. For instance, to run GP in the single locus mode on the entire pool-seq data of the *D. melanogaster* genome from a small sample ( $\approx 1.6$ M variant sites), it would take 1444 CPU-hours ( $\approx 1$  CPU-month). In contrast, after vectorizing and broadcasting operations for all variants operations using `numba` package, CLEAR took 75 minutes to perform an scan, including precomputation, while the fastest method, CMH, took 17 minutes.

### 3.1 Analysis of a *D. melanogaster* Adaptation to Cold and Hot Temperatures

We applied CLEAR to the data from a study of *D. melanogaster* adaptation to alternating temperatures [55], where 3 replicate samples were chosen from a population of *D. melanogaster* for 59 generations under alternating 12-hour cycles of hot (28°C) and cold (18°C) temperatures and sequenced. In this dataset, sequencing coverage is different across replicates and generations (see Fig. S2 of [74]) which makes variant depths highly heterogeneous (Suppl. Figs. S5, S4). We computed the  $\mathcal{H}^+$  statistic for sliding windows of 30Kbp with steps of 10Kbp over the whole genome. After filtering out heterochromatic, centromeric and telomeric regions [15, 28], and applying a local false discovery rate  $\leq 0.01$  (Methods), we identified 89 intervals (Fig. 10) containing 968 genes (Suppl. Table S6).

We found 11 GO Biological Process terms to be enriched with Fisher exact  $P$ -value  $\leq 10^{-3}$  (Table 3). The selected genes include many heat shock proteins in enriched ontologies including ‘cold acclimation’ and ‘response to heat’ (Table S5). As longer genes contain more variants, the probability of a false variant being selected could increase with the length of the gene. Although the CLEAR statistic for genes does not favor longer genes, we also performed a single variant based GO enrichment using `Gowinda` [41]. The analysis identified 34 enriched GO terms (Suppl. Table S4) associated with Biological Process. 5 of 11 GO terms in the gene level analysis were also among the 34 `Gowinda` terms (Fisher exact  $p$ -val:  $10^{-8}$ ) suggesting consistency between variant and gene-based analysis.

| Rank | GO ID      | GO Term                                              | $-\log(p\text{-value})$ | Hits | Num of Genes |
|------|------------|------------------------------------------------------|-------------------------|------|--------------|
| 1    | GO:0042742 | defense response to bacterium                        | 5.0                     | 15   | 62           |
| 2    | GO:0009408 | response to heat                                     | 4.8                     | 16   | 71           |
| 3    | GO:0006719 | juvenile hormone catabolic process                   | 4.5                     | 3    | 4            |
| 4    | GO:0008363 | larval chitin-based cuticle development              | 4.5                     | 6    | 14           |
| 5    | GO:0045664 | regulation of neuron differentiation                 | 4.5                     | 3    | 4            |
| 6    | GO:0051291 | protein heterooligomerization                        | 4.5                     | 3    | 4            |
| 7    | GO:0061077 | chaperone-mediated protein folding                   | 4.4                     | 4    | 7            |
| 8    | GO:0009631 | cold acclimation                                     | 4.0                     | 4    | 8            |
| 9    | GO:0030837 | negative regulation of actin filament polymerization | 3.4                     | 3    | 6            |
| 10   | GO:0042026 | protein refolding                                    | 3.1                     | 4    | 11           |
| 11   | GO:0007552 | metamorphosis                                        | 3.0                     | 8    | 36           |

Table 3: **GO (Biological Process) enrichment.**

A Fisher exact test was performed for GO enrichment in genes located in selected regions. All GO terms that contained at least 3 selected genes, and had Fisher exact  $p$ -value  $\leq 10^{-3}$ , are listed above.

## 4 Discussion

We developed a computational tool, CLEAR, that can detect regions under selection experimental evolution experiments of sexual populations. Using extensive simulations, we show that CLEAR outperforms existing methods in detecting selection, locating the favored allele, and estimating selection parameters. Importantly, we make design choices that make CLEAR very fast in practice, facilitating genome-wide studies.

Many factors play a role in adaptation during experimental evolution studies. The statistics used by CLEAR perform well because they account for many of these aspects. CLEAR is not restricted to two-time points, but uses the complete time-series data. Because it uses an exact model, CLEAR achieves robust predictions for all values of the initial frequency. It adjusts for heterogeneous ascertainment bias in finite-depth pooled-seq data to avoid hard filtering variants. It exploits presence of high linkage within a region to compute composite likelihood ratio statistic. Finally, CLEAR uses  $s, h$  as model parameters in its likelihood calculation, and provides optimized estimates of these parameters, which can provide extra information such as fixation time, and dominance (Suppl. Fig. S7).

In our simulations, we found that the power of detection can be severely affected by the sampling schedule as well as initial frequency of the favored allele. In general, while EE studies are powerful,

they also pose some challenges that are not adequately considered by other tools. One serious constraint is the sampling time span, the gap between the first and last sampled generations, which depends upon the generation time of the organism. It can be very small relative to the time of fixation of the favored allele. In *D. melanogaster* for example, 30-50 generations are typical [42], although there are some notable exceptions [86]. Therefore, unless the selection coefficient is very strong, the time series data will only capture a ‘partial sweep’. This limitation is more pronounced in controlled experimental evolution, where the sampling often starts at the onset of selection. In particular, in a hard sweep scenario, the initial frequency of the favored allele is low, and may not reach detectable frequency in sequencing, given the sampling time span. Through exact (discrete-time, discrete-frequency) modeling, CLEAR performs better than competing tools even when initial frequency is low and sampling time span is limited.

However, even if it were possible to sample over a larger time-span, many methods, especially the ones that compute full likelihoods, would simply not scale to allow computation of evolutionary trajectories over a large time-span. In contrast, CLEAR precomputes the transition matrices, and scales linearly with number of samples, irrespective of the time-span in which they were acquired.

Sequence coverage is a practical consideration that is often ignored by other tools. Low sequencing coverage can lead to incorrect frequency estimates, even for the favored allele, especially when the initial frequency is low. CLEAR uses HMMs to explicitly model variation in sequence coverage. Moreover, it computes the composite likelihood from multiple linked sites, reducing the impact of coverage on any one site, and detects selection even when the favored site is not sampled due to low sequencing depth.

In controlled experimental evolution experiments, populations are evolved and inbred. As this scenario involves picking a small number of founders, the effective population size significantly drops from the large number of wild type (e.g., for *D. melanogaster*,  $N_e \approx 10^6$ ) to a small number of founder lines ( $F \approx 10^2$ ). This creates a severe population bottleneck. The bottleneck confounds SFS-based statistics and makes it difficult to fit a model or test a hypothesis (Suppl. Fig. S11). Hence, statistical testing based on SFS statistic provides poor performance in controlled experiments where the initial sampling time is close to the onset of selection. However, SFS-based methods perform very well when sampling is started long after the onset of selection (e.g., sampling from natural populations). The larger time gap from the onset of selection provides an opportunity for the site frequency spectrum to shift away from neutrality.

The comparison of hard and soft sweep scenarios lead to interesting observations. First, when LD is high in the selected region, as is often the case in a hard sweep, composition of scores significantly improves power of detection. When LD is low, as in soft sweep scenarios, composition of scores does not work as well. However, the favored allele is well established at the onset of selection, and will grow faster compared to the hard sweep scenario under identical selection regimes. This makes it possible to detect selection even in soft sweep scenarios. The situation is a little different with respect to localizing the favored allele. In soft sweep scenarios, the favored allele is not in high LD with nearby variants, and its frequency change is independent of them. Therefore, we obtain better localization results in soft sweep scenarios.

There are many directions to improve the analyses presented here. In particular, we plan to focus our attention on other organisms with more complex life cycles and experiments with longer sampling-time-spans. As evolve and resequencing experiments continue to grow, deeper insights into adaptation will go hand in hand with improved computational analysis.

**Software Availability.** The source code and running scripts for CLEAR are publicly available at <https://github.com/bafnalab/clear>.



## Acknowledgments

AI, AA, and VB were supported by grants from the NIH (1R01GM114362) and NSF (DBI-1458557 and IIS-1318386). CS is supported by the European Research Council grant ArchAdapt.

## Conflict of interest

VB is a co-founder, has an equity interest, and receives income from Digital Proteomics, LLC (DP). The terms of this arrangement have been reviewed and approved by the University of California, San Diego in accordance with its conflict of interest policies. DP was not involved in the research presented here.

## 5 Figures

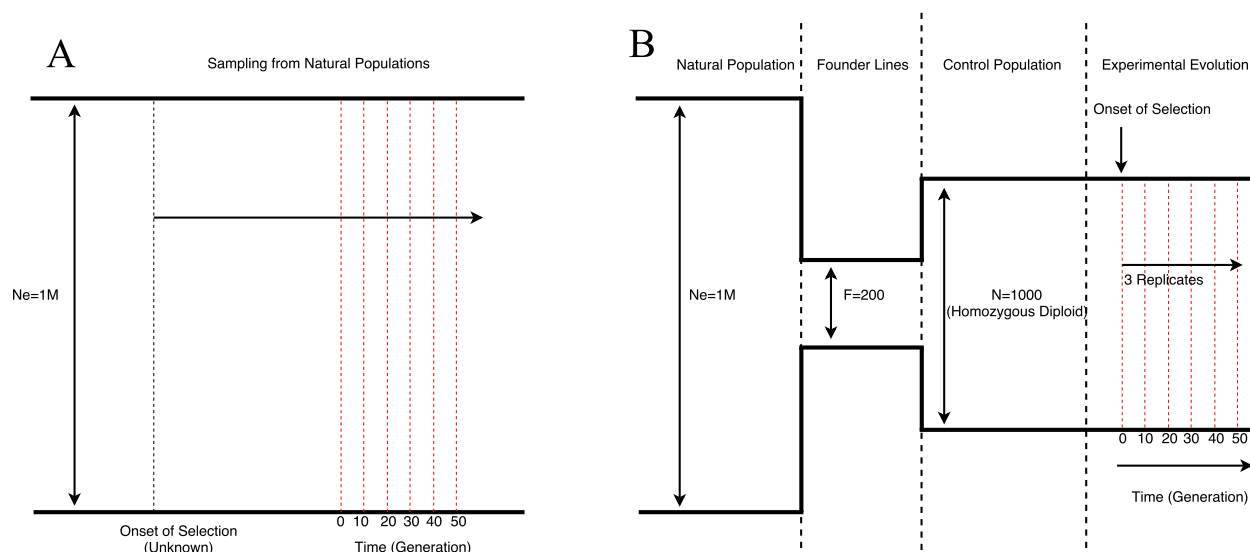

**Fig. 1: Two settings for collecting genomic time series data.**

Different settings in which dynamic data is collected are depicted with typical parameters for *D. melanogaster*. In both settings, 6 samples (vertical red dashed lines) are taken every 10 generation. When sampling from naturally evolving populations (A), the time of onset of selection is unknown, and population size is larger. For (controlled) experimental evolution (B), founder lines are first sampled from a natural population to create a homogeneous population. Then, multiple replicates of this population are evolved and sampled over time.

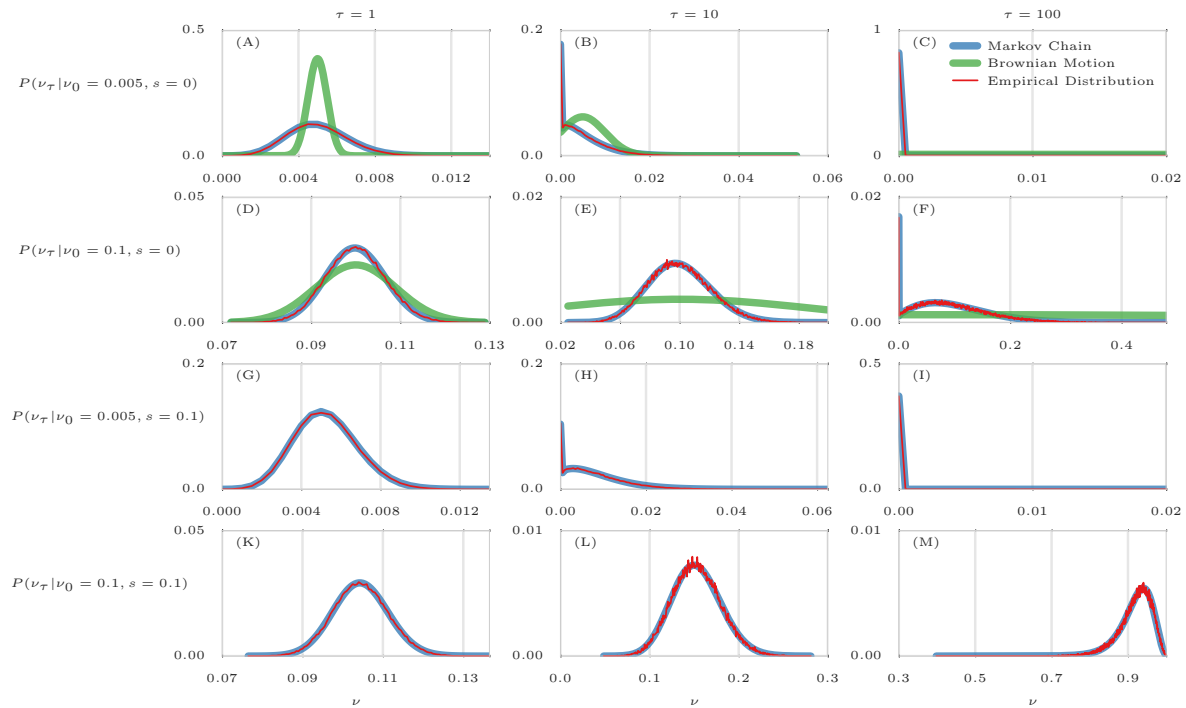

**Fig. 2: Comparison of empirical distributions of allele frequencies (red) versus predictions from Brownian Motion (green), and Markov chain (blue).**

Comparison of empirical and theoretical distributions under neutral evolution (panels A-F) and selection (panels G-M) with different starting frequencies  $\nu_0 \in \{0.005, 0.1\}$  and sampling times of  $\mathcal{T} = \{0, \tau\}$ , where  $\tau \in \{1, 10, 100\}$ . For each panel, the empirical distribution was computed over 100,000 simulations. Brownian motion (Gaussian approximation) provides poor approximations when initial frequency is far from 0.5 (A) or sampling is sparse (B,C,E,F). In addition, Brownian motion can only provide approximations under neutral evolution. In contrast, Markov chain consistently provide a good approximation in all cases.

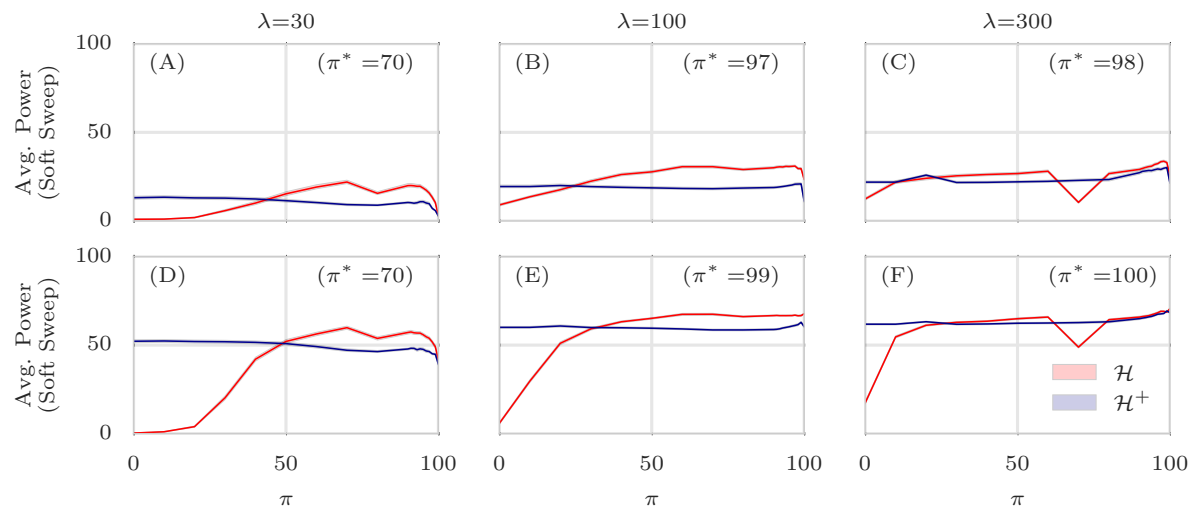

**Fig. 3: Average power of CLEAR statistics as function of percentile cutoffs.**

Detection power is averaged for  $s \in \{0.025, 0.05, 0.075, 0.1\}$  for CLEAR statistics,  $\mathcal{H}_\pi$  and  $\mathcal{H}_\pi^+$ . We denote  $\pi^* = \arg \max_\pi \{\text{Power}(\mathcal{H}), \text{Power}(\mathcal{H}^+)\}$ . Average power was computed using 8000 simulations for each choice of  $\pi$ . The appropriate choice of  $\pi$  can be used to improve performance for different coverage values. In all simulations, 3 replicates are evolved and sampled at generations  $\mathcal{T} = \{0, 10, 20, 30, 40, 50\}$ .

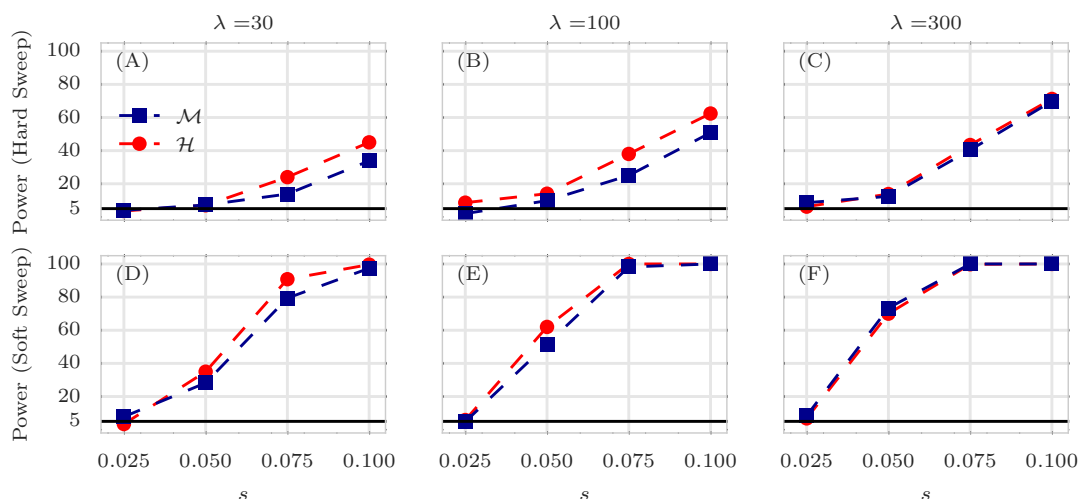

**Fig. 4: Comparison of power of Markov chain and HMM.**

Detection power for Markov chain ( $\mathcal{M}$ ) and HMM ( $\mathcal{H}$ ) under hard (A-C) and soft sweep (D-F) scenarios, for different coverage  $\lambda$  and selection strength  $s$ . The  $y$ -axis measures power – sensitivity with false positive rate  $\text{FPR} \leq 0.05$  – for 2000 simulations of 50Kbp regions. The horizontal line reflects the power of a random classifier. In all simulations, 3 replicates are evolved and sampled at generations  $\mathcal{T} = \{0, 10, 20, 30, 40, 50\}$ .

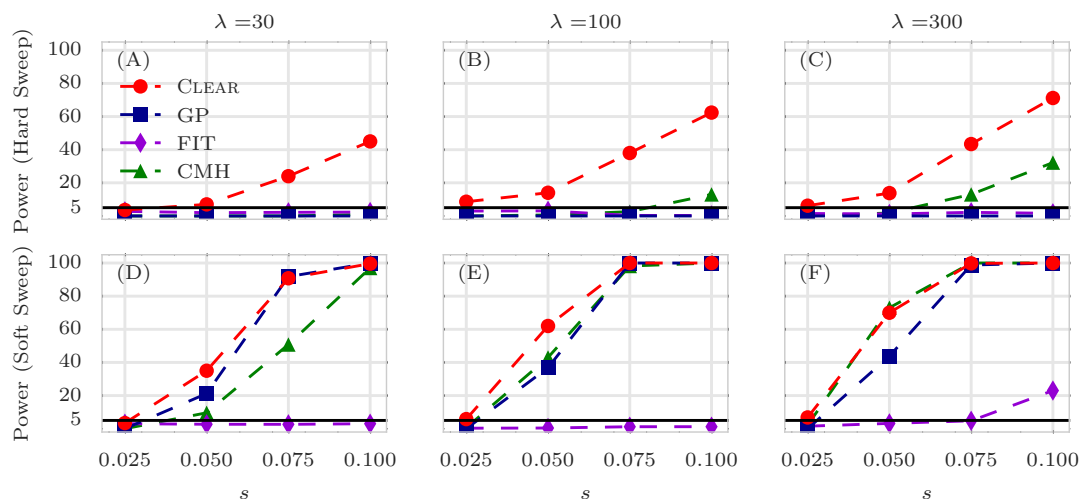

Fig. 5: **Power calculations for detection of selection.**

Detection power for  $\text{CLEAR}(\mathcal{H})$ , Frequency Increment Test (FIT), Gaussian Process (GP), and CMH under hard (A-C) and soft sweep (D-F) scenarios.  $\lambda$ ,  $s$  denote the mean coverage and selection coefficient, respectively. The  $y$ -axis measures power – sensitivity with false positive rate  $\text{FPR} \leq 0.05$  – for 2,000 simulations of 50Kbp regions. The horizontal line reflects the power of a random classifier. In all simulations, 3 replicates are evolved and sampled at generations  $\mathcal{T} = \{0, 10, 20, 30, 40, 50\}$ .

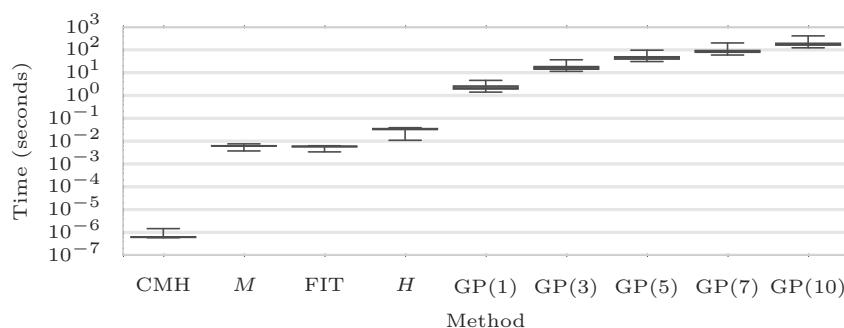

Fig. 6: **Running time.**

Box plots of running time per variant (CPU-secs.) of  $\text{CLEAR}(\mathcal{M}, \mathcal{H})$ , CMH, FIT, and GP with single, 3, 5, 7, and 10 loci over 1000 simulations conducted on a workstation with 4th Generation Intel Core i7 processor. The average running time for each method is shown on the x-axis. In all simulations, 3 replicates are evolved and sampled at generations  $\mathcal{T} = \{0, 10, 20, 30, 40, 50\}$ .

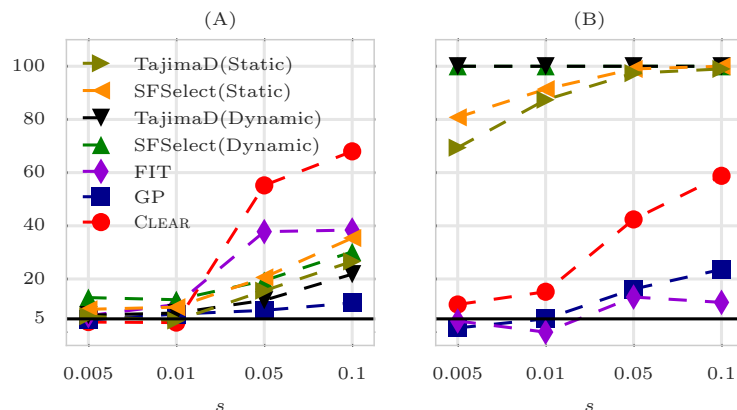

Fig. 7: **Power of SFS based statistics.**

Power of detecting selection for Frequency Increment Test (FIT), Gaussian Process (GP), CLEAR( $\mathcal{H}$ ) on hard sweep natural experimental evolution with  $N_e = 10^4$  and coverage  $\lambda = \infty$ . The measurements are conducted for a range of selection coefficients,  $s$ . Each point represents the mean of 200 simulations. For each simulation, sampling starts at a randomly chosen time, and subsequently 5 replicate samples are acquired every 10 generations. (A) Start of sampling is chosen randomly throughout the sweep  $\tau_1 \sim U[1, t_{\nu=1}(s, N_e)]$ , where  $t_{\nu=x}(s, N_e)$  denotes is the expected time to reach carrier frequency  $x$  in a hard sweep and  $U[a, b]$  is discrete uniform distribution. (B) The start of sampling is chosen near fixation of the favored allele, i.e.  $\tau_1 \sim U[t_{\nu=0.9}(s, N_e), t_{\nu=1}(s, N_e)]$ .

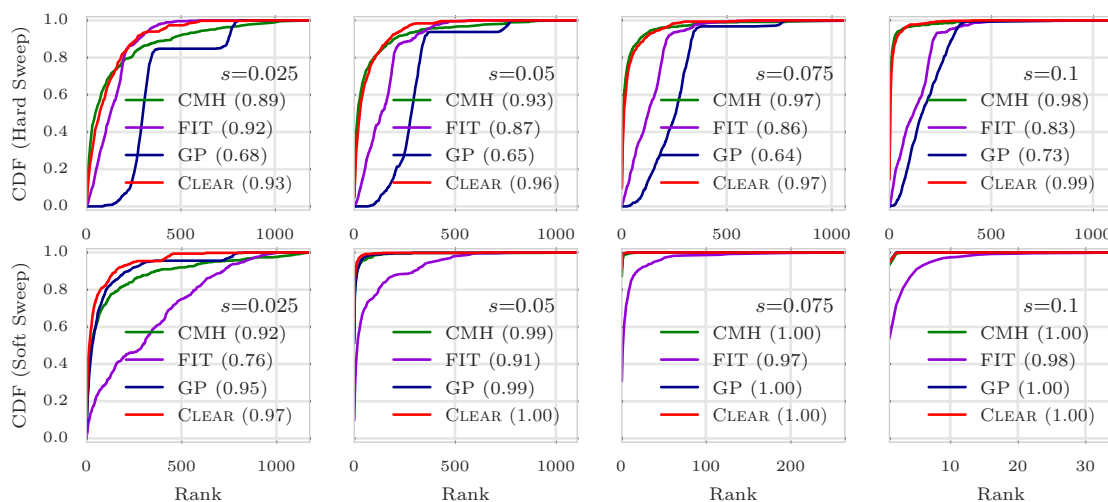

Fig. 8: **Ranking performance for 100 $\times$  coverage.**

Cumulative Distribution Function (CDF) of the distribution of the rank of the favored allele in 1000 simulations for CLEAR ( $\mathcal{H}$ ), Gaussian Process (GP), CMH, and Frequency Increment Test (FIT), for different values of selection coefficient  $s$  and initial carrier frequency. Note that the individual variant CLEAR score ( $\mathcal{H}$ ) is used to rank variants. The Area Under Curve (AUC) is computed as an overall quantitative measure to compare the performance of methods for each configuration. In all simulations, 3 replicates are evolved and sampled at generations  $\mathcal{T} = \{0, 10, 20, 30, 40, 50\}$ .



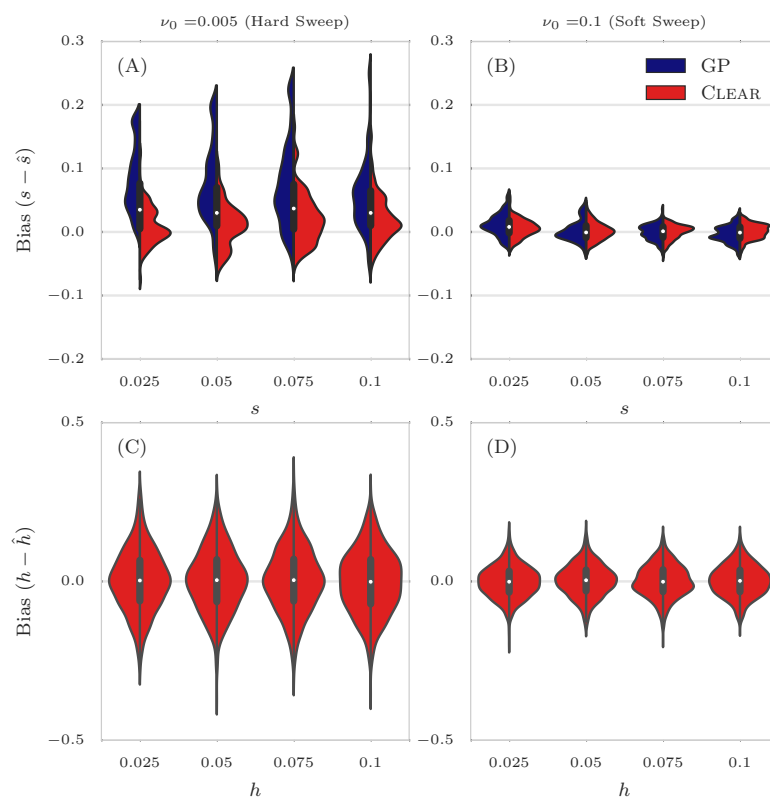

**Fig. 9: Distribution of bias for 100x coverage.**

The distribution of bias ( $s - \hat{s}$ ) in estimating selection coefficient over 1000 simulations using Gaussian Process (GP) and CLEAR ( $H$ ) is shown for a range of choices for the selection coefficient  $s$  and starting carrier frequency  $\nu_0$ , when coverage  $\lambda = 100$  (Panels A,B). GP and CLEAR have similar variance in estimates of  $s$  for soft sweep, while CLEAR provides lower variance in hard sweep. Also see Table S3. Panels C,D show the variance in the estimation of  $h$ . In all simulations, 3 replicates are evolved and sampled at generations  $\mathcal{T} = \{0, 10, 20, 30, 40, 50\}$ .

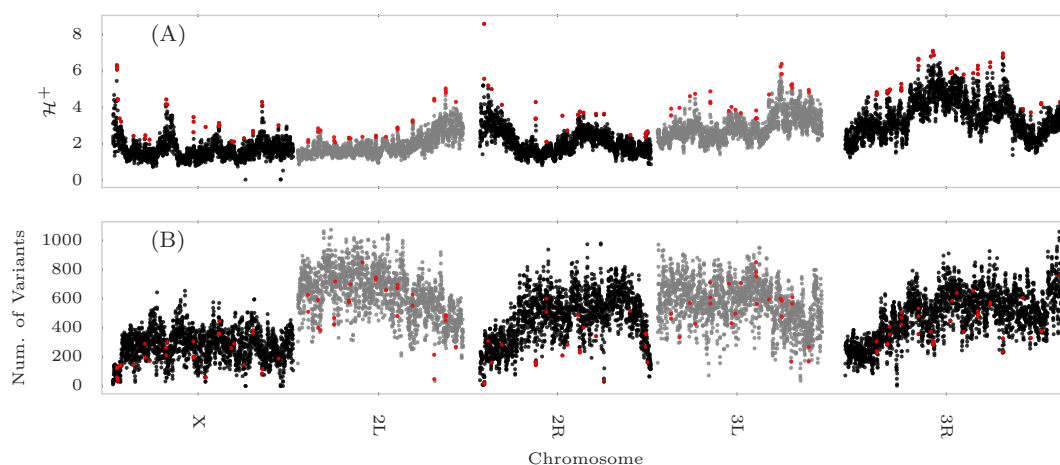

Fig. 10: CLEAR scan of the data from a study of *D. melanogaster* adaptation to alternating temperatures.

Manhattan plot of the CLEAR ( $\mathcal{H}^+$ ) statistic (A) and the number of SNPs (B) in 30Kbp sliding windows with steps of 10Kbp, excluding heterochromatic regions. Regions that exceed the local FDR threshold of  $\mathcal{H}^+$  are shown in red dots.

## References

- [1] Guillaume Achaz. Frequency spectrum neutrality tests: one for all and all for one. *Genetics*, 183(1):249–258, 2009.
- [2] Alan Agresti and Maria Kateri. *Categorical data analysis*. Springer, 2011.
- [3] Joshua M Akey. Constructing genomic maps of positive selection in humans: Where do we go from here? *Genome research*, 19(5):711–722, 2009.
- [4] Frédéric Arieu, Benoit Witkowski, Chanaki Amaratunga, Johann Beghain, Anne-Claire Langlois, Nimol Khim, Saorin Kim, Valentine Duru, Christiane Bouchier, Laurence Ma, and Others. A molecular marker of artemisinin-resistant *Plasmodium falciparum* malaria. *Nature*, 505(7481):50–55, 2014.
- [5] James G Baldwin-Brown, Anthony D Long, and Kevin R Thornton. The power to detect quantitative trait loci using resequenced, experimentally evolved populations of diploid, sexual organisms. *Molecular biology and evolution*, page msu048, 2014.
- [6] Rowan D H Barrett, Sean M Rogers, and Dolph Schluter. Natural selection on a major armor gene in threespine stickleback. *Science*, 322(5899):255–257, 2008.
- [7] Jeffrey E Barrick and Richard E Lenski. Genome dynamics during experimental evolution. *Nature Reviews Genetics*, 14(12):827–839, 2013.
- [8] Jeffrey E Barrick, Dong Su Yu, Sung Ho Yoon, Haeyoung Jeong, Tae Kwang Oh, Dominique Schneider, Richard E Lenski, and Jihyun F Kim. Genome evolution and adaptation in a long-term experiment with *Escherichia coli*. *Nature*, 461(7268):1243–1247, 2009.
- [9] Alan O Bergland, Emily L Behrman, Katherine R O’Brien, Paul S Schmidt, and Dmitri A Petrov. Genomic evidence of rapid and stable adaptive oscillations over seasonal time scales in *Drosophila*. *PLoS Genet*, 10(11):e1004775, 2014.
- [10] Todd Bersaglieri, Pardis C Sabeti, Nick Patterson, Trisha Vanderploeg, Steve F Schaffner, Jared A Drake, Matthew Rhodes, David E Reich, and Joel N Hirschhorn. Genetic signatures of strong recent positive selection at the lactase gene. *The American Journal of Human Genetics*, 74(6):1111–1120, 2004.
- [11] Jonathan P Bollback and John P Huelsenbeck. Clonal interference is alleviated by high mutation rates in large populations. *Molecular biology and evolution*, 24(6):1397–1406, 2007.
- [12] Jonathan P Bollback, Thomas L York, and Rasmus Nielsen. Estimation of 2Nes from temporal allele frequency data. *Genetics*, 179(1):497–502, 2008.
- [13] Adam R Boyko, Scott H Williamson, Amit R Indap, Jeremiah D Degenhardt, Ryan D Hernandez, Kirk E Lohmueller, Mark D Adams, Steffen Schmidt, John J Sninsky, Shamil R Sunyaev, and Others. Assessing the evolutionary impact of amino acid mutations in the human genome. *PLoS Genet*, 4(5):e1000083, 2008.
- [14] Molly K Burke, Joseph P Dunham, Parvin Shahrestani, Kevin R Thornton, Michael R Rose, and Anthony D Long. Genome-wide analysis of a long-term evolution experiment with *Drosophila*. *Nature*, 467(7315):587–590, 2010.

- [15] Josep M Comeron, Ramesh Ratnappan, and Samuel Bailin. The many landscapes of recombination in *Drosophila melanogaster*. *PLoS Genet*, 8(10):e1002905, 2012.
- [16] P Daborn, S Boundy, J Yen, B Pittendrigh, and Others. DDT resistance in *Drosophila* correlates with Cyp6g1 over-expression and confers cross-resistance to the neonicotinoid imidacloprid. *Molecular Genetics and Genomics*, 266(4):556–563, 2001.
- [17] Rachel Daniels, Hsiao-Han Chang, Papa Diogoye Séne, Danny C Park, Daniel E Neafsey, Stephen F Schaffner, Elizabeth J Hamilton, Amanda K Lukens, Daria Van Tyne, Souleymane Mboup, and Others. Genetic surveillance detects both clonal and epidemic transmission of malaria following enhanced intervention in Senegal. *PLoS One*, 8(4):e60780, 2013.
- [18] Vincent J Denef and Jillian F Banfield. In situ evolutionary rate measurements show ecological success of recently emerged bacterial hybrids. *Science*, 336(6080):462–466, 2012.
- [19] Michael M Desai and Joshua B Plotkin. The polymorphism frequency spectrum of finitely many sites under selection. *Genetics*, 180(4):2175–2191, 2008.
- [20] Richard Durbin, Sean R Eddy, Anders Krogh, and Graeme Mitchison. *Biological sequence analysis: probabilistic models of proteins and nucleic acids*. Cambridge university press, 1998.
- [21] Steven N Evans, Yelena Shvets, and Montgomery Slatkin. Non-equilibrium theory of the allele frequency spectrum. *Theoretical population biology*, 71(1):109–119, 2007.
- [22] Warren J Ewens. *Mathematical Population Genetics 1: Theoretical Introduction*, volume 27. Springer Science & Business Media, 2012.
- [23] Gregory Ewing and Joachim Hermisson. MSMS: a coalescent simulation program including recombination, demographic structure and selection at a single locus. *Bioinformatics*, 26(16):2064–2065, 2010.
- [24] Shaohua Fan, Matthew E B Hansen, Yancy Lo, and Sarah A Tishkoff. Going global by adapting local: A review of recent human adaptation. *Science*, 354(6308):54–59, 2016.
- [25] Justin C Fay and Chung-I Wu. Hitchhiking under positive Darwinian selection. *Genetics*, 155(3):1405–1413, 2000.
- [26] Alison F Feder, Sergey Kryazhimskiy, and Joshua B Plotkin. Identifying signatures of selection in genetic time series. *Genetics*, 196(2):509–522, 2014.
- [27] Alison F Feder, Soo-Yon Rhee, Susan P Holmes, Robert W Shafer, Dmitri A Petrov, and Pleuni S Pennings. More effective drugs lead to harder selective sweeps in the evolution of drug resistance in HIV-1. *eLife*, 5, jan 2016.
- [28] Anna-Sophie Fiston-Lavier, Nadia D Singh, Mikhail Lipatov, and Dmitri A Petrov. *Drosophila melanogaster* recombination rate calculator. *Gene*, 463(1):18–20, 2010.
- [29] Yun-Xin Fu. Statistical properties of segregating sites. *Theoretical population biology*, 48(2):172–197, 1995.
- [30] Nandita R Garud, Philipp W Messer, Erkan O Buzbas, and Dmitri A Petrov. Recent selective sweeps in North American *Drosophila melanogaster* show signatures of soft sweeps. *PLoS Genet*, 11(2):e1005004, 2015.

- [31] John H Gillespie. *Population genetics: a concise guide*. JHU Press, 2010.
- [32] Michael M Gottesman. Mechanisms of cancer drug resistance. *Annual review of medicine*, 53(1):615–627, 2002.
- [33] Matthew Hegreness, Noam Shores, Daniel Hartl, and Roy Kishony. An equivalence principle for the incorporation of favorable mutations in asexual populations. *Science*, 311(5767):1615–1617, 2006.
- [34] Kent E Holsinger and Bruce S Weir. Genetics in geographically structured populations: defining, estimating and interpreting  $F_{ST}$ . *Nature Reviews Genetics*, 10(9):639–650, 2009.
- [35] Christopher J R Illingworth and Ville Mustonen. Distinguishing driver and passenger mutations in an evolutionary history categorized by interference. *Genetics*, 189(3):989–1000, 2011.
- [36] Christopher J R Illingworth, Leopold Parts, Stephan Schiffels, Gianni Liti, and Ville Mustonen. Quantifying selection acting on a complex trait using allele frequency time series data. *Molecular biology and evolution*, 29(4):1187–1197, 2012.
- [37] Minako Izutsu, Atsushi Toyoda, Asao Fujiyama, Kiyokazu Agata, and Naoyuki Fuse. Dynamics of Dark-Fly Genome Under Environmental Selections. *G3: Genes— Genomes— Genetics*, pages g3—115, 2015.
- [38] Aashish R Jha, Cecelia M Miles, Nodia R Lippert, Christopher D Brown, Kevin P White, and Martin Kreitman. Whole-genome resequencing of experimental populations reveals polygenic basis of egg-size variation in *Drosophila melanogaster*. *Molecular biology and evolution*, 32(10):2616–2632, 2015.
- [39] Agnes Jónás, Thomas Taus, Carolin Kosiol, Christian Schlötterer, and Andreas Futschik. Estimating the Effective Population Size from Temporal Allele Frequency Changes in Experimental Evolution. *Genetics*, aug 2016.
- [40] Tadeusz J Kawecki, Richard E Lenski, Dieter Ebert, Brian Hollis, Isabelle Olivieri, and Michael C Whitlock. Experimental evolution. *Trends in ecology & evolution*, 27(10):547–560, 2012.
- [41] Robert Kofler and Christian Schlötterer. Gowinda: unbiased analysis of gene set enrichment for genome-wide association studies. *Bioinformatics*, 28(15):2084–2085, 2012.
- [42] Robert Kofler and Christian Schlötterer. A guide for the design of evolve and resequencing studies. *Molecular biology and evolution*, page mst221, 2013.
- [43] Gregory I Lang, David Botstein, and Michael M Desai. Genetic variation and the fate of beneficial mutations in asexual populations. *Genetics*, 188(3):647–661, 2011.
- [44] Gregory I Lang, Daniel P Rice, Mark J Hickman, Erica Sodergren, George M Weinstock, David Botstein, and Michael M Desai. Pervasive genetic hitchhiking and clonal interference in forty evolving yeast populations. *Nature*, 500(7464):571–574, 2013.
- [45] Quan Long, Fernando A Rabanal, Dazhe Meng, Christian D Huber, Ashley Farlow, Alexander Platzer, Qingrun Zhang, Bjarni J Vilhjálmsson, Arthur Korte, Viktoria Nizhynska, and Others. Massive genomic variation and strong selection in *Arabidopsis thaliana* lines from Sweden. *Nature genetics*, 45(8):884–890, 2013.

- [46] Michael Lynch, Darius Bost, Sade Wilson, Takahiro Maruki, and Scott Harrison. Population-genetic inference from pooled-sequencing data. *Genome biology and evolution*, 6(5):1210–1218, 2014.
- [47] Anna-Sapfo Malaspinas, Orestis Malaspinas, Steven N Evans, and Montgomery Slatkin. Estimating allele age and selection coefficient from time-series data. *Genetics*, 192(2):599–607, 2012.
- [48] Frank Maldarelli, Mary Kearney, Sarah Palmer, Robert Stephens, JoAnn Mican, Michael A Polis, Richard T Davey, Joseph Kovacs, Wei Shao, Diane Rock-Kress, and Others. HIV populations are large and accumulate high genetic diversity in a nonlinear fashion. *Journal of virology*, 87(18):10313–10323, 2013.
- [49] Nelson E Martins, Vítor G Faria, Viola Nolte, Christian Schlötterer, Luis Teixeira, Élio Sucena, and Sara Magalhães. Host adaptation to viruses relies on few genes with different cross-resistance properties. *Proceedings of the National Academy of Sciences*, 111(16):5938–5943, 2014.
- [50] Iain Mathieson and Gil McVean. Estimating selection coefficients in spatially structured populations from time series data of allele frequencies. *Genetics*, 193(3):973–984, 2013.
- [51] Philipp W Messer and Dmitri A Petrov. Population genomics of rapid adaptation by soft selective sweeps. *Trends in ecology & evolution*, 28(11):659–669, 2013.
- [52] Shalini Nair, Denae Nash, Daniel Sudimack, Anchalee Jaidee, Marion Barends, Anne-Catrin Uhlemann, Sanjeev Krishna, François Nosten, and Tim J C Anderson. Recurrent gene amplification and soft selective sweeps during evolution of multidrug resistance in malaria parasites. *Molecular Biology and Evolution*, 24(2):562–573, 2007.
- [53] Rasmus Nielsen and James Signorovitch. Correcting for ascertainment biases when analyzing SNP data: applications to the estimation of linkage disequilibrium. *Theoretical population biology*, 63(3):245–255, 2003.
- [54] Rasmus Nielsen, Scott Williamson, Yuseob Kim, Melissa J Hubisz, Andrew G Clark, and Carlos Bustamante. Genomic scans for selective sweeps using SNP data. *Genome research*, 15(11):1566–1575, 2005.
- [55] Pablo Orozco-ter Wengel, Martin Kapun, Viola Nolte, Robert Kofler, Thomas Flatt, and Christian Schlötterer. Adaptation of *Drosophila* to a novel laboratory environment reveals temporally heterogeneous trajectories of selected alleles. *Molecular ecology*, 21(20):4931–4941, 2012.
- [56] Tugce Oz, Aysegul Guvenek, Sadik Yildiz, Enes Karaboga, Yusuf Talha Tamer, Nirva Mumcuyan, Vedat Burak Ozan, Gizem Hazal Senturk, Murat Cokol, Pamela Yeh, and Others. Strength of selection pressure is an important parameter contributing to the complexity of antibiotic resistance evolution. *Molecular biology and evolution*, page msu191, 2014.
- [57] Bo Peng and Marek Kimmel. simuPOP: a forward-time population genetics simulation environment. *Bioinformatics*, 21(18):3686–3687, 2005.
- [58] Edward Pollak. A new method for estimating the effective population size from allele frequency changes. *Genetics*, 104(3):531–548, 1983.



- [59] Susan E Ptak and Molly Przeworski. Evidence for population growth in humans is confounded by fine-scale population structure. *Trends in Genetics*, 18(11):559–563, 2002.
- [60] Sebastian E Ramos-Onsins and Julio Rozas. Statistical properties of new neutrality tests against population growth. *Molecular biology and evolution*, 19(12):2092–2100, 2002.
- [61] Brian J Reid, Rumen Kostadinov, and Carlo C Maley. New strategies in Barrett’s esophagus: integrating clonal evolutionary theory with clinical management. *Clinical Cancer Research*, 17(11):3512–3519, 2011.
- [62] Silvia C Remolina, Peter L Chang, Jeff Leips, Sergey V Nuzhdin, and Kimberly A Hughes. Genomic basis of aging and life-history evolution in *Drosophila melanogaster*. *Evolution*, 66(11):3390–3403, 2012.
- [63] Roy Ronen, Glenn Tesler, Ali Akbari, Shay Zakov, Noah A Rosenberg, and Vineet Bafna. Predicting Carriers of Ongoing Selective Sweeps Without Knowledge of the Favored Allele. *PLoS Genet*, 11(9):e1005527, 2015.
- [64] Roy Ronen, Nitin Udpa, Eran Halperin, and Vineet Bafna. Learning natural selection from the site frequency spectrum. *Genetics*, 195(1):181–193, 2013.
- [65] P C Sabeti, S F Schaffner, B Fry, J Lohmueller, P Varilly, O Shamovsky, A Palma, T S Mikkelsen, D Altshuler, and E S Lander. Positive natural selection in the human lineage. *science*, 312(5780):1614–1620, 2006.
- [66] Pardis C Sabeti, Patrick Varilly, Ben Fry, Jason Lohmueller, Elizabeth Hostetter, Chris Cot-sapas, Xiaohui Xie, Elizabeth H Byrne, Steven A McCarroll, Rachelle Gaudet, and Others. Genome-wide detection and characterization of positive selection in human populations. *Nature*, 449(7164):913–918, 2007.
- [67] Stanley A Sawyer and Daniel L Hartl. Population genetics of polymorphism and divergence. *Genetics*, 132(4):1161–1176, 1992.
- [68] Christian Schlötterer, R Kofler, E Versace, R Tobler, and S U Franssen. Combining experimental evolution with next-generation sequencing: a powerful tool to study adaptation from standing genetic variation. *Heredity*, 114(5):431–440, 2015.
- [69] Tatum S Simonson, Yingzhong Yang, Chad D Huff, Haixia Yun, Ga Qin, David J Witherspoon, Zhenzhong Bai, Felipe R Lorenzo, Jinchuan Xing, Lynn B Jorde, and Others. Genetic evidence for high-altitude adaptation in Tibet. *Science*, 329(5987):72–75, 2010.
- [70] Brad Spellberg, Robert Guidos, David Gilbert, John Bradley, Helen W Boucher, W Michael Scheld, John G Bartlett, John Edwards, Infectious Diseases Society of America, and Others. The epidemic of antibiotic-resistant infections: a call to action for the medical community from the Infectious Diseases Society of America. *Clinical Infectious Diseases*, 46(2):155–164, 2008.
- [71] Matthias Steinrücken, Anand Bhaskar, and Yun S Song. A novel spectral method for inferring general diploid selection from time series genetic data. *The annals of applied statistics*, 8(4):2203, 2014.
- [72] Wolfgang Stephan, Yun S Song, and Charles H Langley. The hitchhiking effect on linkage disequilibrium between linked neutral loci. *Genetics*, 172(4):2647–2663, 2006.

- [73] Fumio Tajima. Statistical method for testing the neutral mutation hypothesis by DNA polymorphism. *Genetics*, 123(3):585–595, 1989.
- [74] Jonathan Terhorst, Christian Schlötterer, and Yun S Song. Multi-locus Analysis of Genomic Time Series Data from Experimental Evolution. *PLoS Genet*, 11(4):e1005069, 2015.
- [75] Ray Tobler, Susanne U Franssen, Robert Kofler, Pablo Orozco-terWengel, Viola Nolte, Joachim Hermisson, and Christian Schlötterer. Massive habitat-specific genomic response in *D. melanogaster* populations during experimental evolution in hot and cold environments. *Molecular biology and evolution*, 31(2):364–375, 2014.
- [76] Hande Topa, Ágnes Jónás, Robert Kofler, Carolin Kosiol, and Antti Honkela. Gaussian process test for high-throughput sequencing time series: application to experimental evolution. *Bioinformatics*, page btv014, 2015.
- [77] Thomas L Turner, Andrew D Stewart, Andrew T Fields, William R Rice, and Aaron M Tarone. Population-based resequencing of experimentally evolved populations reveals the genetic basis of body size variation in *Drosophila melanogaster*. *PLoS Genet*, 7(3):e1001336, 2011.
- [78] Joseph J Vitti, Sharon R Grossman, and Pardis C Sabeti. Detecting natural selection in genomic data. *Annual review of genetics*, 47:97–120, 2013.
- [79] Jinliang Wang. A pseudo-likelihood method for estimating effective population size from temporally spaced samples. *Genetical research*, 78(03):243–257, 2001.
- [80] Robin S Waples. A generalized approach for estimating effective population size from temporal changes in allele frequency. *Genetics*, 121(2):379–391, 1989.
- [81] Ellen G Williamson and Montgomery Slatkin. Using maximum likelihood to estimate population size from temporal changes in allele frequencies. *Genetics*, 152(2):755–761, 1999.
- [82] Scott H Williamson, Melissa J Hubisz, Andrew G Clark, Bret A Payseur, Carlos D Bustamante, and Rasmus Nielsen. Localizing recent adaptive evolution in the human genome. *PLoS Genet*, 3(6):e90, 2007.
- [83] Mark A Winters, Robert M Lloyd Jr, Robert W Shafer, Michael J Kozal, Michael D Miller, and Mark Holodniy. Development of elvitegravir resistance and linkage of integrase inhibitor mutations with protease and reverse transcriptase resistance mutations. *PloS one*, 7(7):e40514, 2012.
- [84] Xin Yi, Yu Liang, Emilia Huerta-Sanchez, Xin Jin, Zha Xi Ping Cuo, John E Pool, Xun Xu, Hui Jiang, Nicolas Vinckenbosch, Thorfinn Sand Korneliussen, and Others. Sequencing of 50 human exomes reveals adaptation to high altitude. *Science*, 329(5987):75–78, 2010.
- [85] Hiba Zahreddine and K L Borden. Mechanisms and insights into drug resistance in cancer. *Front Pharmacol*, 4(28.10):3389, 2013.
- [86] Dan Zhou, Nitin Udpa, Merrill Gersten, DeeAnn W Visk, Ali Bashir, Jin Xue, Kelly A Frazer, James W Posakony, Shankar Subramaniam, Vineet Bafna, and Gabriel G. Haddad. Experimental selection of hypoxia-tolerant *Drosophila melanogaster*. *Proceedings of the National Academy of Sciences*, 108(6):2349–2354, 2011.

## 6 Appendix

### 6.1 An approximate logistic function for allele frequency dynamics

Assume that a site is evolving under selection constraints  $s, h \in \mathbb{R}$ , where  $s$  and  $h$  denote selection strength and overdominance, respectively. Let  $\nu_t$  denote the frequency of the site at time  $\tau_t \in \mathcal{T}$ . Then,  $\nu_{t+}$ , the frequency at time  $\tau_t + 1$  can be estimated (See Eq. 3) using:

$$\hat{\nu}_{t+} = \nu_t + \frac{s(h + (1 - 2h)\nu_t)\nu_t(1 - \nu_t)}{1 + s\nu_t(2h + (1 - 2h)\nu_t)}. \quad (\text{S1})$$

We can show that the dynamic of the favored allele can be modeled via a logistic function, in the case of directional selection ( $h = 0.5$ ). Taking derivatives of Eq. S1, we have

$$\frac{d\nu_t}{dt} = \frac{s\nu_t(1 - \nu_t)}{2 + 2s\nu_t} \quad (\text{S2})$$

To, solve the differential equation, note that for small  $s$ ,  $2 + 2s\nu_t \approx 2$ . Substituting,

$$\nu_t = \frac{1}{1 + \frac{1-\nu_0}{\nu_0}e^{-st/2}} = \sigma(st/2 + \eta(\nu_0)) \quad (\text{S3})$$

where  $\sigma(\cdot)$  is the logistic function and  $\eta(\cdot)$  is logit function (inverse of the logistic function).

### 6.2 Dynamic of Tajima's $D$

In this part we derive dynamic of Tajima's  $D$  statistic in *hard sweep* as function of its value at the onset of selection,  $D_0$ , selection strength and the frequency of the favored allele at the onset of selection. Let  $D_0, \Pi_0, W_0$ , be Tajima's  $D$ , Tajima's estimate of  $\theta$ , and Watterson's estimate of  $\theta$  at time zero and  $D_0 = \Pi_0 - W_0$ . In order to compute,  $D_t = \Pi_t - W_t$  we compute  $\Pi_t$  and  $W_t$  separately as follows. Let  $P$  be the  $n \times n$  matrix of pairwise heterozygosity of individuals, then  $\Pi = 1/n^2 \sum P_{ij}$ . So, if the population consist of  $\nu n$  identical carrier haplotype (due to lack of recombination), their pairwise hamming distance is zero and should be subtracted from the total  $\Pi_t$ :

$$\Pi_t = (1 - \nu_t^2)\Pi_0 \quad (\text{S4})$$

To compute  $W_t$ , first remember that  $W_t = \frac{m_t}{S_n}$  where  $m_t$  is the number of segregating sites at time  $t$  and  $S_n = \sum_i^n 1/i \approx \log(n)$ . Also we have

$$\frac{W_t}{W_0} = \frac{\frac{m_t}{S_n}}{\frac{m_0}{S}} \Rightarrow W_t = \frac{m_t}{m_0} W_0 \quad (\text{S5})$$

Because of hard sweep and lack of recombination assumption, the population at time  $t$  consist of  $(1 - \nu_t)n$  non-carrier haplotypes and  $\nu_t n$  identical carrier haplotypes. While not strictly correct, we assume that the  $(1 - \nu_t)n + 1$  individuals are evolving neutrally. Using this assumption, we have

$$\frac{m_t}{m_0} = \frac{\log((1 - \nu_t)n + 1)\theta}{\log(n)\theta} \approx \frac{\log((1 - \nu_t)n)}{\log(n)} = \frac{\log(1 - \nu_t) + \log(n)}{\log(n)} = 1 + \frac{\log(1 - \nu_t)}{\log(n)}. \quad (\text{S6})$$

Finally, by putting Eqs. S4, S5, S6 together, we can explicitly write the dynmics of  $D$  statistic as

$$\begin{aligned} D_t &= (1 - \nu_t^2)\Pi_0 - (1 + \frac{\log(1 - \nu_t)}{\log(n)})W_0 \\ &= D_0 - \log(1 - \nu_t)\frac{W_0}{\log(n)} - \nu_t^2\Pi_0 \\ &\approx D_0 - \log(1 - \sigma(st/2 + \eta(\nu_0)))\frac{W_0}{\log(n)} - \sigma(st/2 + \eta(\nu_0))^2\Pi_0. \end{aligned} \quad (\text{S7})$$

where  $\sigma$  and  $\eta$  are logistic and logit functions.

### 6.3 Dynamics of Fay and Wu's $H$

In any finite population size of  $n$  with  $m$  segregating sites, allele frequencies take discrete values, i.e.,  $x_j \in \{\frac{1}{n}, \frac{2}{n}, \dots, \frac{n-1}{n}\}$ ,  $\forall j \in 1, \dots, m$ . We have the following:

$$\|\mathbf{x}\|^2 = \sum_{j=1}^m x_j^2 = \sum_{i=1}^{n-1} \left(\frac{i}{n}\right)^2 \xi_i = \frac{(n-1)}{2n} H,$$

where  $\xi_i$  is the number of sites with frequency  $i/n$  and  $H$  is the Fay & Wu's estimate of  $\theta$  and  $\mathbf{x} \in (0, 1)^m$  is the vector of allele frequency of a region with  $m$  segregating sites. Recently, Ronen *et al.* [63] devised the 1-HAF statistic for identifying selection on static data, and showed that the expected value of 1-HAF statistic is given by:

$$\mathbb{E}[1\text{-HAF}(t)] = n\|\mathbf{x}_t\|^2 \approx ng(\nu_t) \quad (\text{S8})$$

where

$$g(\nu_t) = \theta\nu_t \left( \frac{\nu_t + 1}{2} - \frac{1}{(1 - \nu_t)n + 1} \right) + \theta(1 - \nu_t) \left( \frac{n + 1}{2n} - \frac{1}{(1 - \nu_t)n + 1} \right) \quad (\text{S9})$$

The dynamics of Fay & Wu's estimate are given by

$$H_t = \frac{n-1}{2} g(\nu_t) \quad (\text{S10})$$

### 6.4 Greedy computation of time-series SFS-based statistics

As discussed in Section 2.2, modeling dynamic of Tajima's  $D$  (and Fay&Wu's  $H$ ) requires knowledge of initial carrier frequency  $\nu_0$  and the value of  $D$  (and  $H$ ) statistic at the onset of selection, which are often unknown. As these statistics are monotonically decreasing (or increasing for SFSelect) under no demographic changes, we chose to greedily aggregate statistics throughout time. For example, for Tajima's  $D$ , we have

$$\mathcal{D} = \sum_{t \in \mathcal{T}} D_t \quad (\text{S11})$$

where the same procedure applies to Fay&Wu's  $H$  and SFSelect.

### 6.5 Linkage Disequilibrium

Nonrandom associations, Linkage Disequilibrium (LD), between polymorphisms are established in the substitution process, broken by recombination events and reinforced by selection. Although LD can not be measured in pooled sequencing data (phased haplotype data is required), it is still worthwhile to examine the behavior of LD as a result of the interaction between recombination and natural selection. In this part we theoretically overview expected LD in short EEs.

Let  $\rho_0$  be the LD at time zero between the favored allele and a segregating site  $l$  base-pairs away, then under natural selection we have

$$\rho_t = \alpha_t \beta_t \rho_0 = e^{-rtl} \left( \frac{K_t}{K_0} \right) \rho_0 \quad (\text{S12})$$

where  $K_t = 2\nu_t(1-\nu_t)$  is the heterozygosity at the selected site,  $r$  is the recombination rate/bp/gen. The *decay factor*,  $\alpha_t = e^{-rtl}$ , and *growth factor*,  $\beta_t$  (see Eq. 30-31 in [72]), are result of recombination

and selection, respectively. Fig. S14 presents the expected theoretical value of LD when  $\rho_0 = 0.5$  between favored allele (site at position 500K) and the rest of genome, and  $\nu_0 = 0.1$ . For neutral evolution (top), LD decays exponentially through space and time, while in natural selection (bottom), LD increases and then decreases. Interestingly, LD increases to its maximum value, 1, for the nearby region (the plateau in the Fig. S14 bottom) of the favored allele.

In principle, LD increases after the onset of selection, until  $\log(\alpha_t) + \log(\beta_t) > 0$ , see Eq. S12. Specifically, log of decay term is linear and, using Eq. S3, we write growth factor in term of initial frequency  $\nu_0$  and selection strength  $s$ . Fig. S15 depicts interaction of decay and growth factors for weak and strong selection and soft and hard sweeps. In all the case, LD of the favored allele with a segregating site 50Kbp away, increases in the first 50 generations, which give rise to increasing number of *hitchhikers*.

Increase of LD in a large (100Kbp) region is particularly advantageous to the task of identifying the region under selection, if the composite statistics is used. As a result,  $\mathcal{H}$  statistic outperforms existing (single-loci) tools in identifying selection. In contrast, augmentation of LD, increases the number of candidates for the favored allele, which makes is difficult to localize the favored allele.

| Hard Sweep |        |           | Soft Sweep |        |           |
|------------|--------|-----------|------------|--------|-----------|
| $\lambda$  | Method | Avg Power | $\lambda$  | Method | Avg Power |
| 300        | CLEAR  | 34        | 300        | CLEAR  | 69        |
| 300        | CMH    | 12        | 300        | CMH    | 69        |
| 300        | FIT    | 2         | 300        | GP     | 61        |
| 300        | GP     | 0         | 300        | FIT    | 8         |
| 100        | CLEAR  | 31        | 100        | CLEAR  | 67        |
| 100        | CMH    | 4         | 100        | CMH    | 60        |
| 100        | FIT    | 2         | 100        | GP     | 59        |
| 100        | GP     | 0         | 100        | FIT    | 1         |
| 30         | CLEAR  | 20        | 30         | CLEAR  | 57        |
| 30         | FIT    | 2         | 30         | GP     | 53        |
| 30         | CMH    | 0         | 30         | CMH    | 39        |
| 30         | GP     | 0         | 30         | FIT    | 3         |

Table S1: **Average of power for detecting selection.**

Average power is computed for 8000 simulations with  $s \in \{0.025, 0.05, 0.075, 0.1\}$ . Frequency Increment Test (FIT), Gaussian Process (GP), CLEAR ( $\mathcal{H}$  statistic) and Cochran Mantel Haenszel (CMH) are compared for different initial carrier frequency  $\nu_0$ . For all sequencing coverages, CLEAR outperform other methods. When coverage is not high ( $\lambda \in \{30, 100\}$ ) and initial frequency is low (hard sweep), CLEAR significantly perform better than others.

| Method | Avg. Time per Locus |
|--------|---------------------|
| CMH    | 0.0                 |
| $M$    | 0.006               |
| FIT    | 0.006               |
| $H$    | 0.033               |
| GP(1)  | 2.551               |
| GP(3)  | 19.177              |
| GP(5)  | 50.291              |
| GP(7)  | 95.602              |
| GP(10) | 202.017             |

Table S2: **Average running time per variant in seconds for different methods.**

| Method | $\nu_0$ | Mean  | STD   |
|--------|---------|-------|-------|
| GP     | 0.005   | 0.073 | 0.061 |
| CLEAR  | 0.005   | 0.016 | 0.035 |
| GP     | 0.1     | 0.002 | 0.016 |
| CLEAR  | 0.1     | 0.002 | 0.013 |

Table S3: **Mean and standard deviation of the distribution of bias ( $s - \hat{s}$ ) of 8000 simulations with coverage  $\lambda = 100\times$  and  $s \in \{0.025, 0.05, 0.075, 0.1\}$ .**



| GO ID      | GO Term                                                                 | $-\log(p\text{-value})$ |
|------------|-------------------------------------------------------------------------|-------------------------|
| GO:0001558 | regulation of cell growth                                               | 4.1                     |
| GO:0001700 | embryonic development via the syncytial blastoderm                      | 4.1                     |
| GO:0003341 | cilium movement                                                         | 4.1                     |
| GO:0006030 | chitin metabolic process                                                | 3.8                     |
| GO:0006355 | regulation of transcription, DNA-templated                              | 4.1                     |
| GO:0006367 | transcription initiation from RNA polymerase II promoter                | 4.1                     |
| GO:0006508 | proteolysis                                                             | 4.1                     |
| GO:0006719 | juvenile hormone catabolic process                                      | 4.1                     |
| GO:0006839 | mitochondrial transport                                                 | 4.1                     |
| GO:0007018 | microtubule-based movement                                              | 4.1                     |
| GO:0007269 | neurotransmitter secretion                                              | 3.6                     |
| GO:0007291 | sperm individualization                                                 | 4.1                     |
| GO:0007298 | border follicle cell migration                                          | 4.1                     |
| GO:0007475 | apposition of dorsal and ventral imaginal disc-derived wing surfaces    | 4.1                     |
| GO:0007552 | metamorphosis                                                           | 3.8                     |
| GO:0007602 | phototransduction                                                       | 4.1                     |
| GO:0008104 | protein localization                                                    | 3.1                     |
| GO:0008340 | determination of adult lifespan                                         | 4.1                     |
| GO:0008362 | chitin-based embryonic cuticle biosynthetic process                     | 4.1                     |
| GO:0009312 | oligosaccharide biosynthetic process                                    | 3.0                     |
| GO:0009408 | response to heat                                                        | 4.1                     |
| GO:0015991 | ATP hydrolysis coupled proton transport                                 | 4.1                     |
| GO:0016079 | synaptic vesicle exocytosis                                             | 4.1                     |
| GO:0016485 | protein processing                                                      | 4.1                     |
| GO:0031146 | SCF-dependent proteasomal ubiquitin-dependent protein catabolic process | 4.1                     |
| GO:0035556 | intracellular signal transduction                                       | 4.1                     |
| GO:0042742 | defense response to bacterium                                           | 3.8                     |
| GO:0043066 | negative regulation of apoptotic process                                | 3.1                     |
| GO:0045494 | photoreceptor cell maintenance                                          | 4.1                     |
| GO:0045664 | regulation of neuron differentiation                                    | 4.1                     |
| GO:0045861 | negative regulation of proteolysis                                      | 4.1                     |
| GO:0048675 | axon extension                                                          | 4.1                     |
| GO:0055114 | oxidation-reduction process                                             | 3.1                     |
| GO:0061024 | membrane organization                                                   | 4.1                     |

Table S4: **GO enrichment analysis of data from a study of *D. melanogaster* adaptation to alternating temperatures using Gowinda.**

| FlyBase ID  | GO Term          | Gene Name |
|-------------|------------------|-----------|
| FBgn0001224 | cold acclimation | Hsp23     |
| FBgn0001225 | cold acclimation | Hsp26     |
| FBgn0001233 | cold acclimation | Hsp83     |
| FBgn0034758 | cold acclimation | CG13510   |
| FBgn0001224 | response to heat | Hsp23     |
| FBgn0001225 | response to heat | Hsp26     |
| FBgn0001233 | response to heat | Hsp83     |
| FBgn0001223 | response to heat | Hsp22     |
| FBgn0001226 | response to heat | Hsp27     |
| FBgn0001227 | response to heat | Hsp67Ba   |
| FBgn0001228 | response to heat | Hsp67Bb   |
| FBgn0001229 | response to heat | Hsp67Bc   |
| FBgn0003301 | response to heat | rut       |
| FBgn0004575 | response to heat | Syn       |
| FBgn0010303 | response to heat | hep       |
| FBgn0019949 | response to heat | Cdk9      |
| FBgn0023517 | response to heat | Pgam5     |
| FBgn0025455 | response to heat | CycT      |
| FBgn0026086 | response to heat | Adar      |
| FBgn0035982 | response to heat | CG4461    |

Table S5: **Enriched genes of analysis of data from a study of *D. melanogaster* adaptation to alternating temperatures associated with GO terms of “cold acclimation” and “response to heat”.**

| Statistic                                | Value     |
|------------------------------------------|-----------|
| Num. of Variants                         | 1,608,032 |
| Num. of Candidate Intervals              | 89        |
| Total Num. of Genes                      | 17,293    |
| Num. of Variant Genes                    | 12,834    |
| Num. of Genes within Candidate Intervals | 968       |
| Total Num. of GO                         | 6,983     |
| Num. of GO with 3 or More Genes          | 3,447     |
| Num. of Candidate Variants for Gowinda   | 2,886     |

Table S6: **General statistics of analysis of data from a study of *D. melanogaster* adaptation to alternating temperatures.**

## 7 Supplemental Figures and Tables

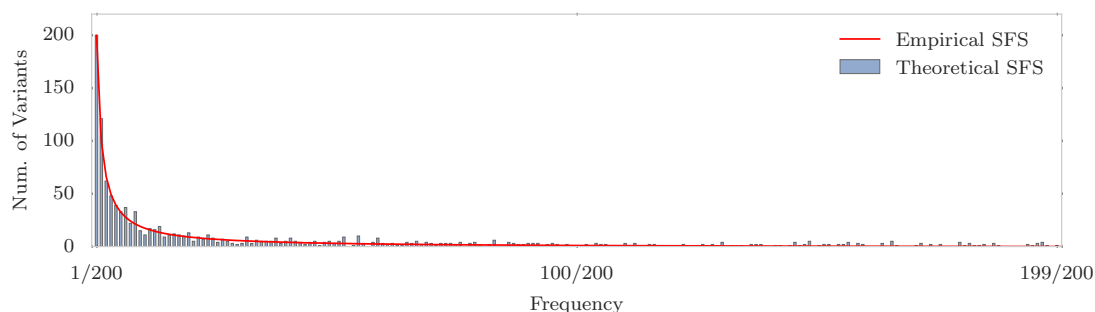

**Fig. S1: Site Frequency Spectrum.**

Theoretical and Empirical SFS in a 50Kbp region for a neutral population of 200 individuals when  $N_e = 10^6$  and  $\mu = 10^{-9}$ . The  $x$ -axis corresponds to site frequency, and the  $y$ -axis to the number of variants with a specific frequency. In a neutral population, majority of the variations stand in low frequency.

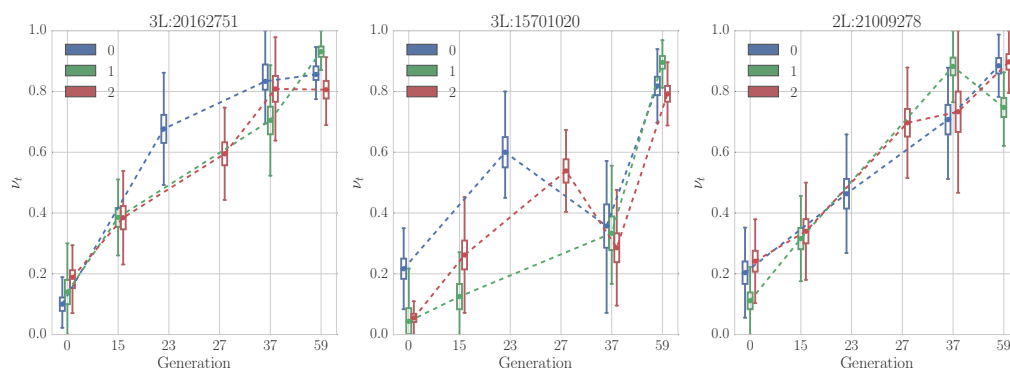

**Fig. S2: Trajectory of pool-sequenced variants.**

Trajectory of three different variants that are increasing in frequency over time. Note that for read count data, the true allele frequency is not known. Here we draw the posterior distribution of the allele frequency at each time point using box plot. The median of each distribution is denoted by dots. The variance of each box is seen to be inversely related to the depth of the measurement. For instance, generation 59 is sequenced with higher coverage than generation 37. As a result, variance of observations in generation 59 is considerably smaller.

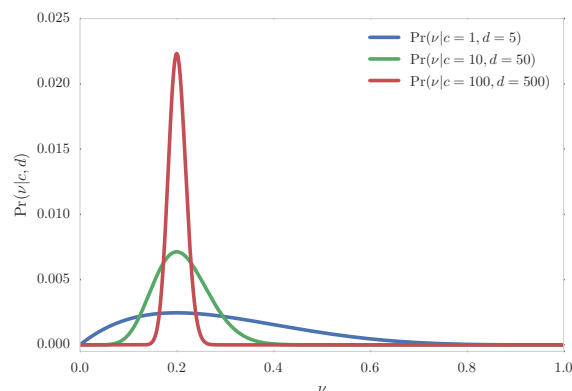

**Fig. S3: Posterior distribution of allele frequency.**

Distribution of hidden allele frequency for different values of depth  $d = \{5, 50, 500\}$ . In all cases, the true frequency is 0.2. The estimated frequency values are binomially distributed, with different variances, around the true value in all cases with.

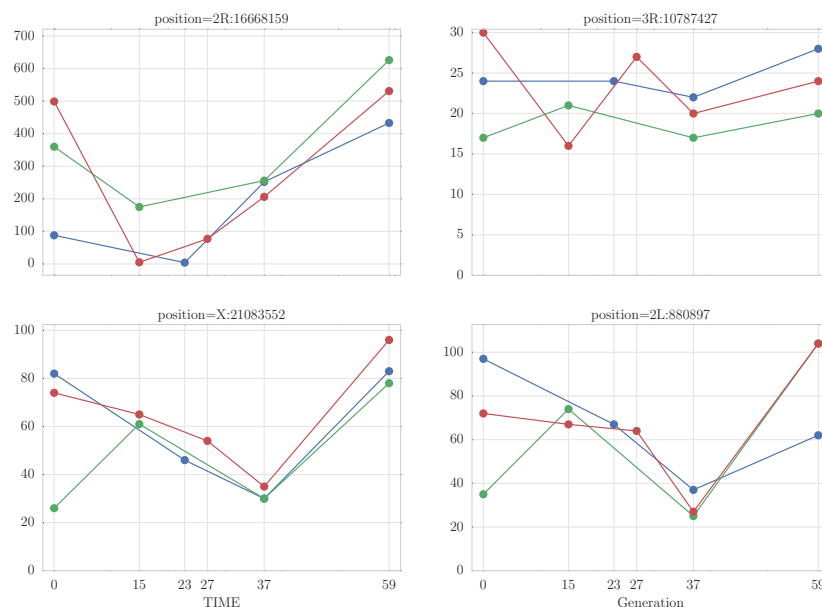

**Fig. S4: Coverage heterogeneity in time series data.**

Each panel shows the read depth for 3 replicates of the data from a study of *D. melanogaster* adaptation to alternating temperatures data (see section 3.1). Heterogeneity in depth of coverage is seen between replicates, and also at different time points, in all 4 variants. None of these sites pass the the hard filtering with minimum depth of 30.

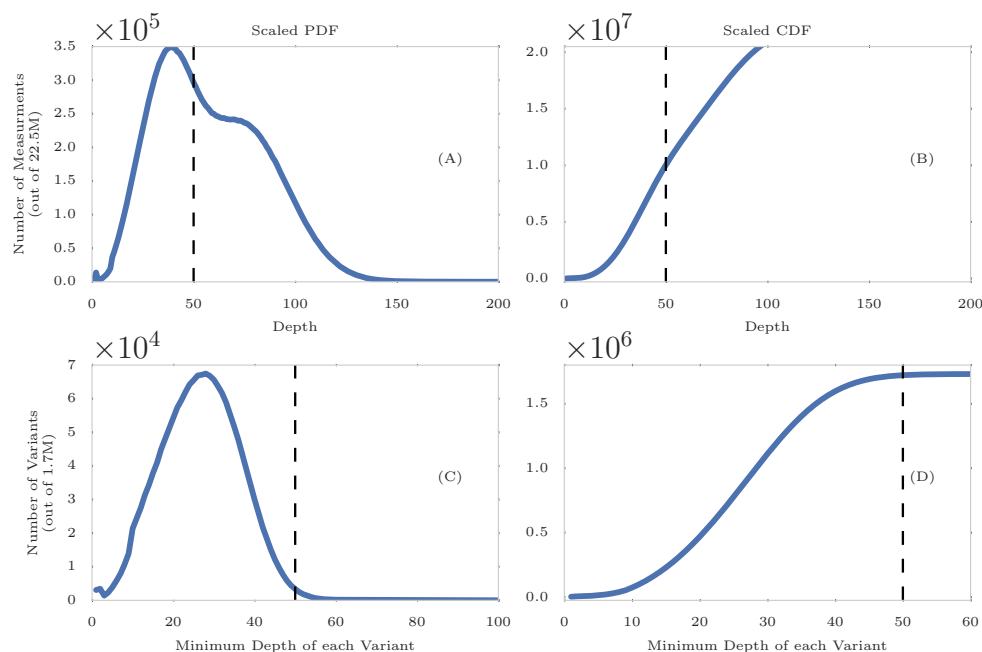

**Fig. S5: Distribution of depth in the real data.**

Scaled PDF (A) and CDF (B) of the read depths of all ( $\approx 22.1$ M) measurements, i.e., all replicates and time points of the all ( $\approx 1.7$ M) variants. Scaled PDF (C) and CDF (D) of the minimum depth of sites. While more than half most ( $\approx 12.5$ M) of the measurements have depth of 50 or greater (dashed line in (A),(B)), only a small fraction ( $\approx 11$ K) of variants (dashed line in (C),(D)) pass the filter of having minimum depth of 50.

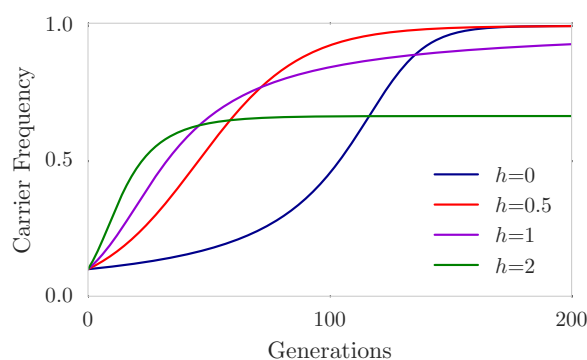

**Fig. S6: Natural selection in infinite population.**

Trajectory of the favored allele in an infinite population with  $s = 0.1$  for  $h = 0$  (recessive favored allele),  $h = 0.5$  (directional selection),  $h = 1$  (dominant favored allele) and  $h = 2$  (overdominant favored allele).

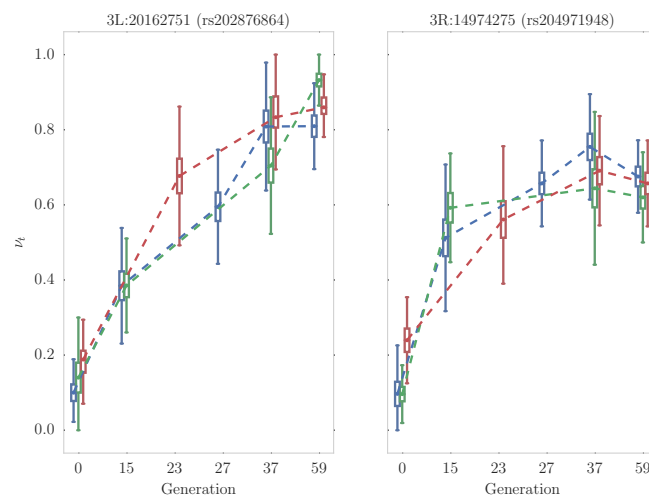

Fig. S7: Variant showing strong signal of directional (Left) and over-dominant, aka balancing selection (Right).

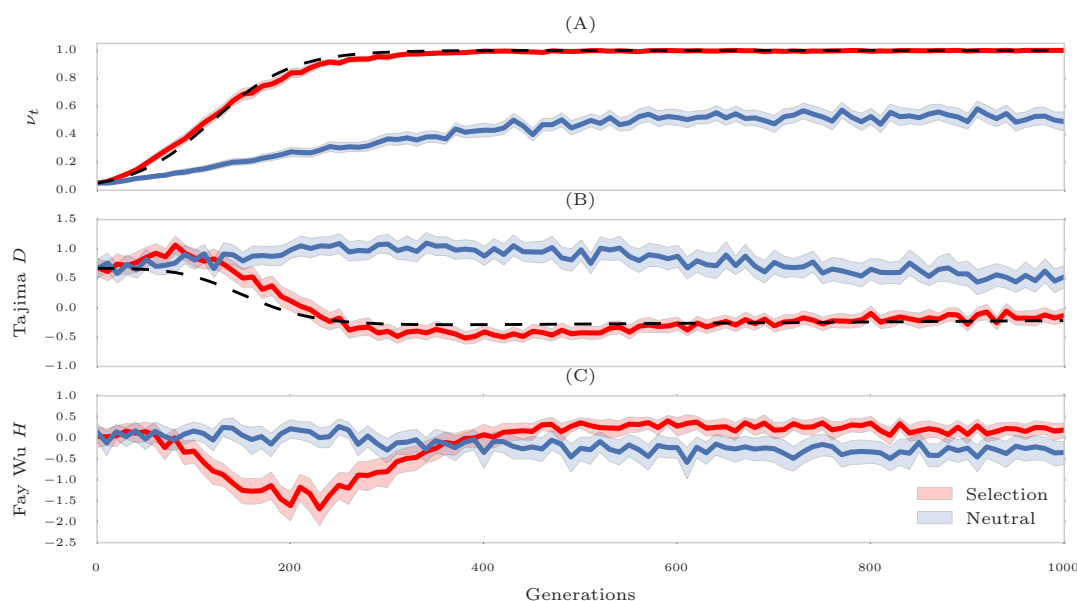

Fig. S8: Dynamic SFS-based statistics.

Mean and 95% CI of 100 simulations for neutral (blue trajectories) selection with  $s = 0.1$  (red trajectories). In all case, statistic computed for a 50Kbp window and  $N_e = 10^4$ ,  $\mu = 10^{-9}$ . The dashed line shows the parametric models derived in Appendix 6.2.

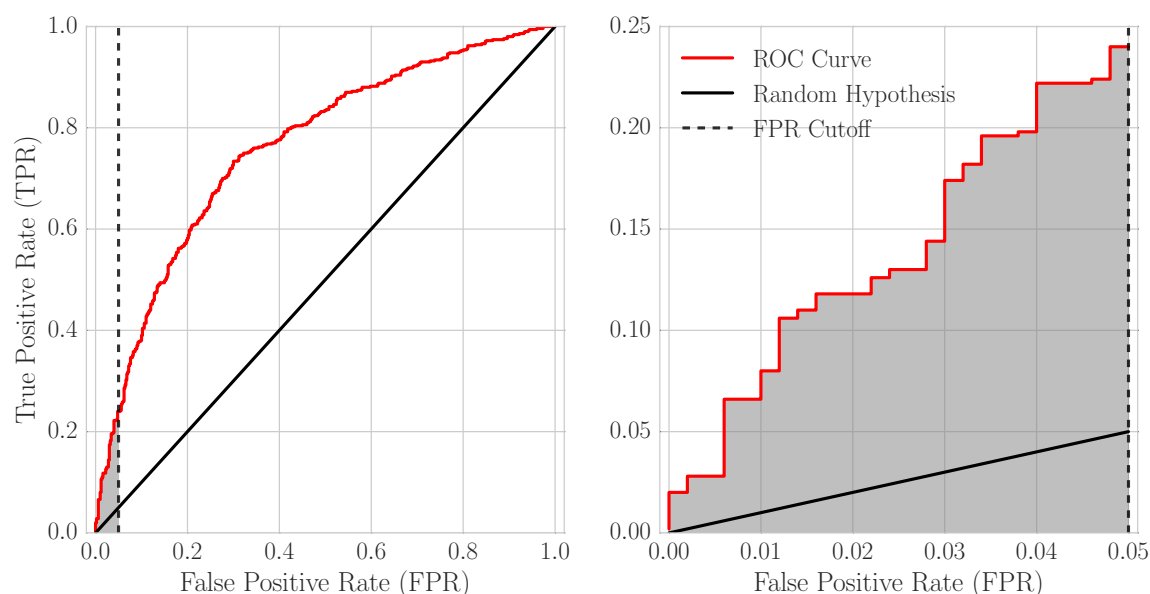

**Fig. S9: Schematic for computing power of detecting selection.**

Receiver Operating Characteristics (ROC) curve (left) for classification of 2000 simulations (1000 selection and 1000 neutral). The Area Under the Curve (AUC) represents overall performance. The diagonal black line represents performance of a random hypothesis which achieves Area under the curve (AUC) of 0.5. To avoid computing AUC for the regions where FPR is unacceptably high, we restrict ROC curve to the region where  $FPR \leq 0.05$  (right). In this case, we define power to be the (scaled) AUC of the restricted region.



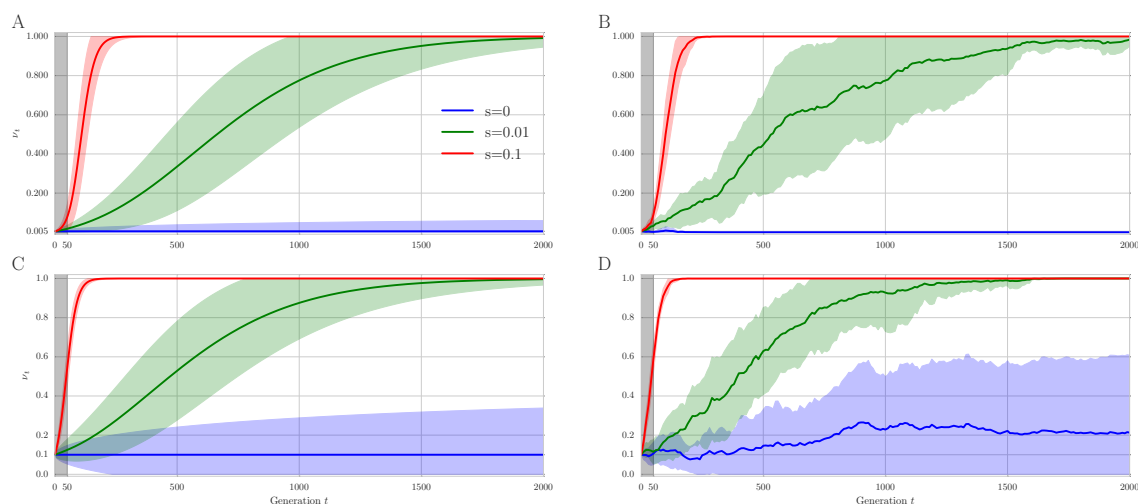

**Fig. S10: Theoretical (Markov chain) and Empirical trajectories of favored allele for hard and soft sweep scenarios.**

Theoretical (A,C) and empirical (B,D) trajectories of the frequency of the favored allele are computed for 1000 simulations of populations with 1000 diploid individuals. Each curve shows the mean and the 95% confidence interval. Panels A and C represent theoretical Markov chain based calculations of the favored allele frequency under hard ( $\nu_0$  is small), and soft sweep due to standing variation (higher  $\nu_0$ ), for a range of values of  $s$ . Note that  $s = 0$  corresponds to neutral evolution. Similarly, panels B and D show the empirical forward simulations of populations under the same selection regimes, and hard/soft-sweep scenarios. The first 50 generations are shaded in gray to represent the typical sampling span of EE experiments. The plot illustrates the difficulty of EE experiments in having to predict selection at a very early stage of the sweep. The signal is slightly stronger under standing variation scenario. The theoretical and empirical simulations are in close correspondence.

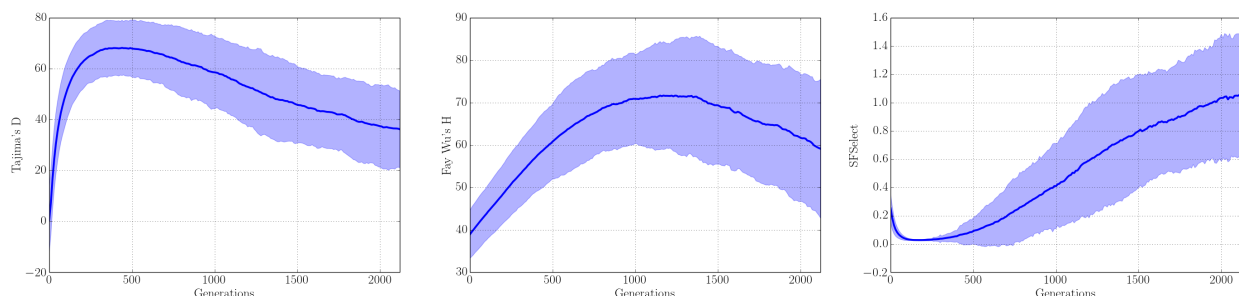

**Fig. S11: Effect of bottleneck in a neutral experimental evolution experiment with restricted number of founder lines.**

Dynamic of SFS based statistics under neutral evolution when  $F = 200$  founders were selected from a larger population size ( $N_e = 10^{-6}$ ). The statistics for Tajima's  $D$  (left), Fay Wu's  $H$  (middle) and SFSelect were computed for 1000 neutral simulations and the mean and 95% confidence interval plotted. Under neutral evolution, all the statistics are expected to vary around a fixed mean through time. However, under selective constraint,  $D$  and  $H$  take negative values, while SFSelect take positive values. In experimental evolution, bottleneck effect will suppress the signal of selection, especially in early generations.

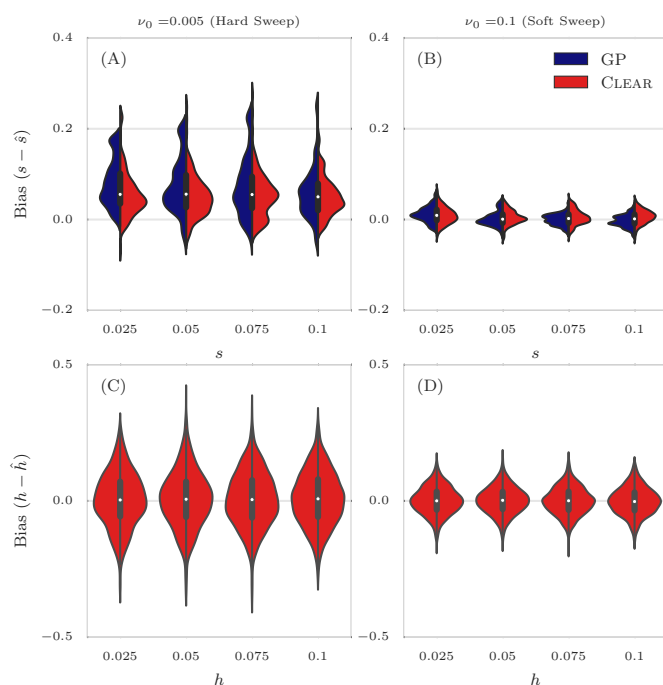

**Fig. S12: Distribution of bias for 30 $\times$  coverage.**

The distribution of bias ( $s - \hat{s}$ ) in estimating selection coefficient over 1000 simulations using Gaussian Process (GP) and CLEAR ( $H$ ) is shown for a range of choices for the selection coefficient  $s$  and starting carrier frequency  $\nu_0$ , when coverage  $\lambda = 30$  (Panels A,B). GP and CLEAR have similar variance in estimates of  $s$  for soft sweep, while CLEAR provides lower variance in hard sweep. Also see Table S3. Panels C,D show the variance in the estimation of  $h$ .

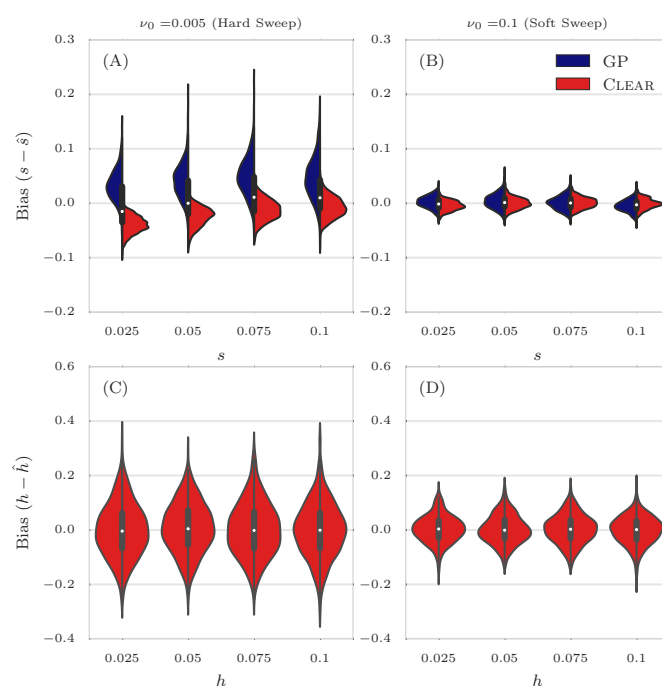

**Fig. S13: Distribution of bias for infinite coverage.**

The distribution of bias ( $s - \hat{s}$ ) in estimating selection coefficient over 1000 simulations using Gaussian Process (GP) and CLEAR ( $H$ ) is shown for a range of choices for the selection coefficient  $s$  and starting carrier frequency  $\nu_0$ , when coverage  $\lambda = \infty$  (Panels A,B). GP and CLEAR have similar variance in estimates of  $s$  for soft sweep, while CLEAR provides lower variance in hard sweep. Also see Table S3. Panels C,D show the variance in the estimation of  $h$ .

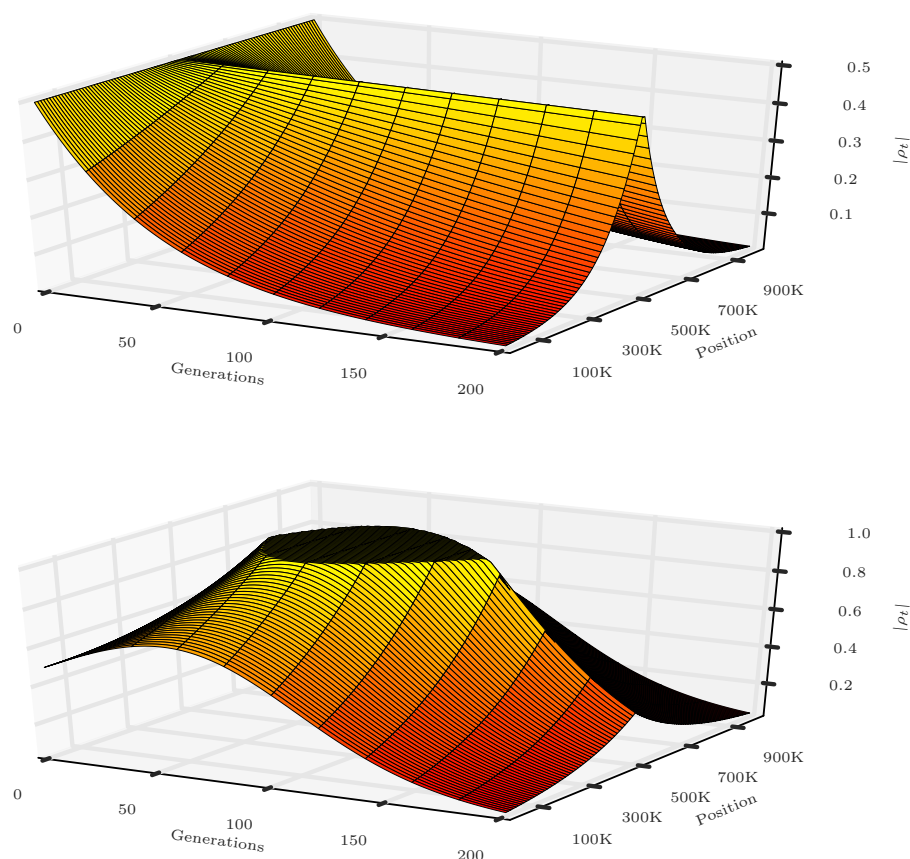

**Fig. S14: Expected dynamic of LD under selection and neutral evolution.**

Dynamic of LD ( $\rho_t$ ) of a 1Mbp genome to the favored allele (at position 500K) is drawn as function of position and time for neutral (top) and selection(bottom) regimes. For sake of illustration, we assumed that at generations 0, LD of all variants with the favored allele is 0.5, initial frequency of the favored allele is 0.1, recombination rate is  $r = 2 \times 10^{-8}$  (top). The selection strength is 0 and 0.05 for neutral and selection regimes, respectively. As expected LD decay exponentially through space and time. However, selection causes LD to increase then decrease.

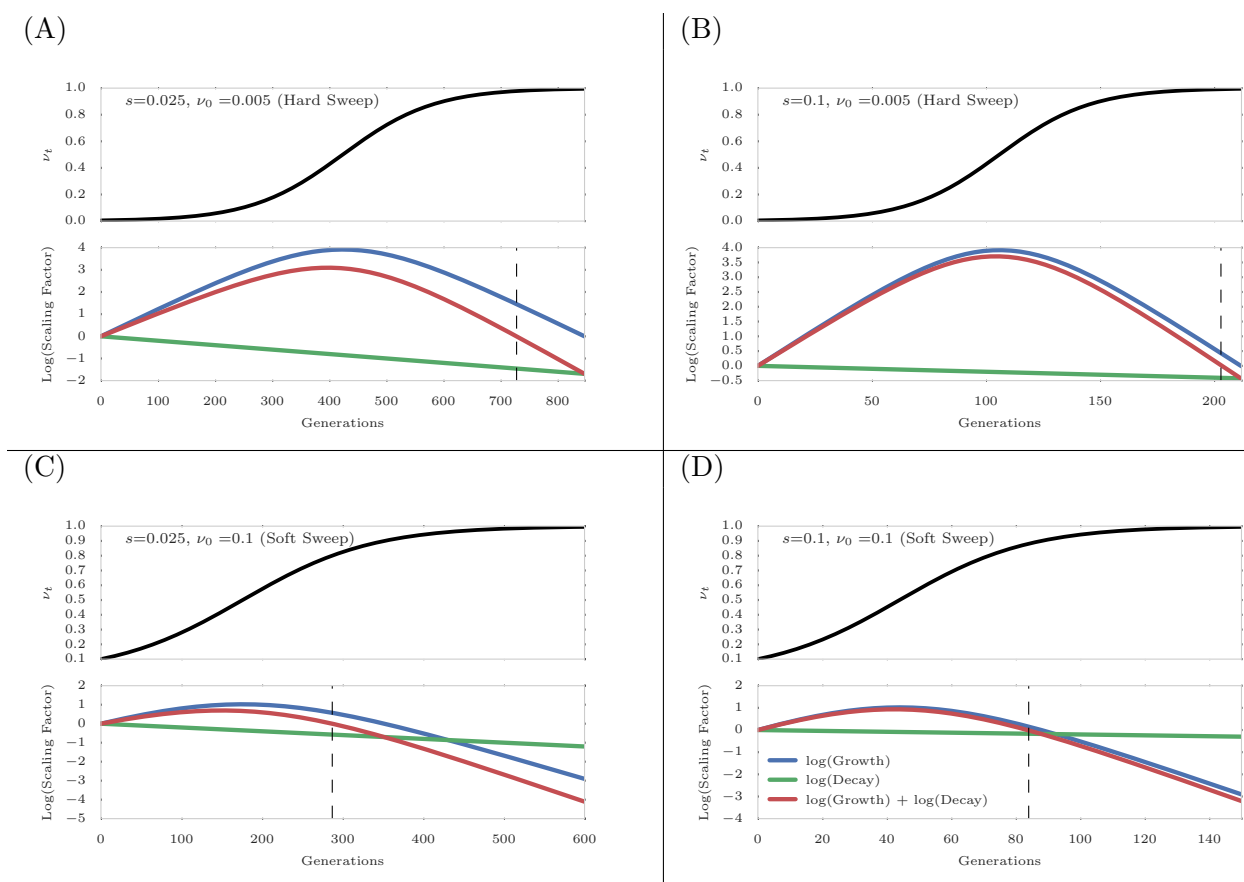

**Fig. S15: Interaction between growth and decay factors of LD.**

Expected evolution of LD under natural selection for weak selection ( $s=0.01$ ) and a distance of 100Kb between sites for hard (A,B) and soft (C,D) sweeps. In addition to recombination, initial frequency of the favored allele and selection strength determine dynamic of LD. The vertical dashed line denotes the time in which LD start to decrease. In all cases, LD increase in first 50 generations, which implies that localizing adaptive allele in short term experimental evolution is a difficult task.

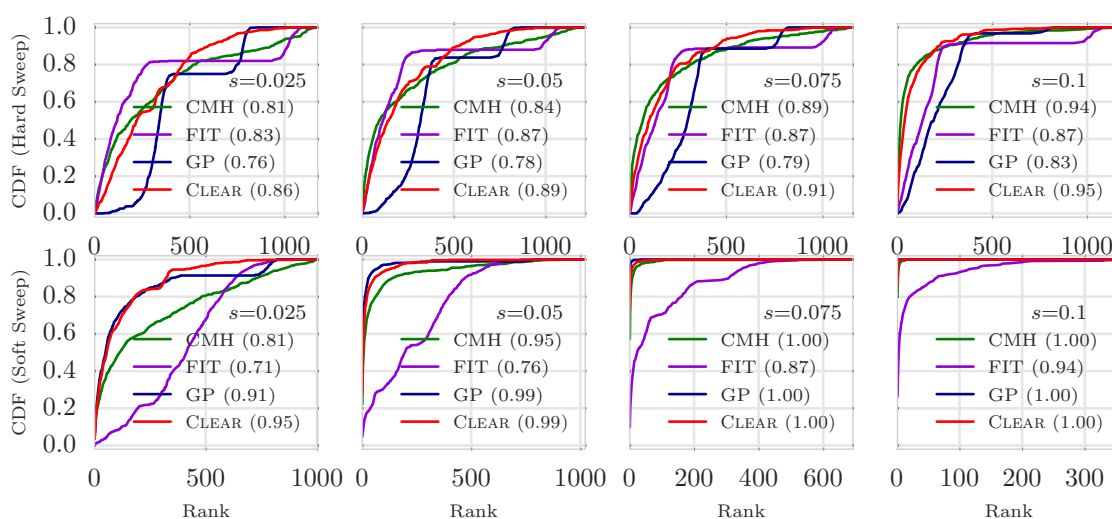

Fig. S16: **Ranking performance for 30x coverage.**

Cumulative Distribution Function (CDF) of the distribution of the rank of the favored allele in 1000 simulations for CLEAR ( $H$ ), Gaussian Process (GP), CMH, and Frequency Increment Test (FIT), for different values of selection coefficient  $s$  and initial carrier frequency. Note that the individual variant CLEAR score ( $H$ ) is used to rank variants. The Area Under Curve (AUC) is computed as a quantitative measure to compare the performance of methods for each configuration.

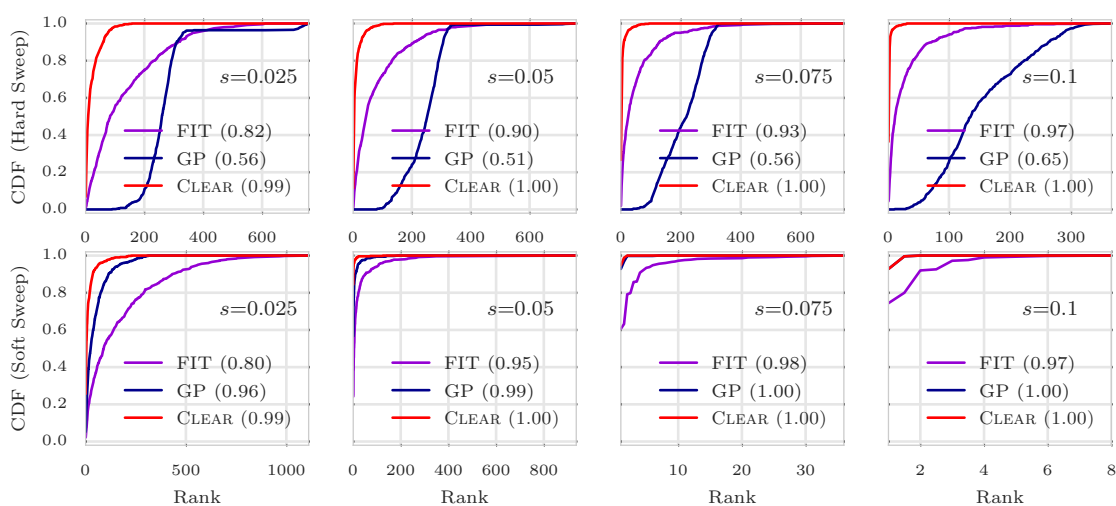

Fig. S17: **Ranking performance for infinite coverage.**

Cumulative Distribution Function (CDF) of the distribution of the rank of the favored allele in 1000 simulations for CLEAR ( $H$ ), Gaussian Process (GP), CMH, and Frequency Increment Test (FIT), for different values of selection coefficient  $s$  and initial carrier frequency. Note that the individual variant CLEAR score ( $H$ ) is used to rank variants. The Area Under Curve (AUC) is computed as a quantitative measure to compare the performance of methods for each configuration.
